# Supplementary material for: Comparison of plasma and cerebrospinal fluid proteomes identifies gene products guiding adult neurogenesis and neural differentiation in birds
Source: Sci Rep. 2021 Mar 5;11:5312. doi: 10.1038/s41598-021-84274-x (PMC7935914; doi:10.1038/s41598-021-84274-x)
Supplement: Supplementary file 3 — Supplementary Table S2. Core proteomes of CSF and PL. [file 41598_2021_84274_MOESM3_ESM.xlsx]

## Sheet: CSF GG x GG
Supplementary Table S2. Core proteomes of CSF and PL
Gene.names	GG1-CSF	GG2-CSF	GG3-CSF	GG4-CSF	GG5-CSF	GG6-CSF	GG7-CSF	GG_CSF_AVERAGE	GG_CSF_STDEV
ALB	38.181	38.9656	37.6505	37.958	37.6624	38.016	37.797	38.0329	0.420366
APOA1	38.2469	38.4997	37.2774	37.4691	37.1176	37.4006	37.1435	37.5936	0.511272
TRFE	36.7334	37.5245	36.8084	37.1292	36.6031	36.9349	36.4195	36.879	0.337177
TTR	37.0913	38.434	36.3457	36.1708	36.321	36.2917	36.4195	36.7248	0.751227
PTGDS	35.0381	36.5645	36.4509	35.6552	36.0213	35.6906	35.8502	35.8958	0.47941
LOC107051274	35.4595	35.9712	34.5524	35.0105	34.4211	34.5217	34.6236	34.9371	0.538889
AGT	34.7911	35.4308	34.5048	34.5951	34.1242	34.6358	34.1537	34.6051	0.407505
CST3	34.386	32.6023	34.9294	34.4902	34.8835	34.6301	34.5736	34.3565	0.739092
TF	34.8526	35.7333	33.7247	34.0571	33.4529	33.7857	33.3394	34.1351	0.798598
P20763	33.0651	33.4427	32.8209	33.4803	32.8412	32.8295	33.1432	33.089	0.262498
C3	32.0724	31.6073	33.1112	33.624	32.7562	33.4839	33.4613	32.8738	0.716808
A2ML4	31.7271	31.5431	32.5942	33.2869	33.1019	33.4431	34.2782	32.8535	0.900827
GC	31.5886	31.9388	32.658	32.719	32.4477	32.6175	32.2408	32.3158	0.390002
HBB	34.941	28.8908	32.6101	27.3997	32.3715	35.468	33.3502	32.1473	2.76942
A0A3Q3AIA0	32.4022	32.7026	31.5275	31.9607	31.6124	31.5591	31.8432	31.944	0.41875
APOD	30.9191	32.2441	32.4598	31.408	32.4872	31.2098	32.0345	31.8232	0.589692
VTN	31.9922	32.3083	31.5223	31.5362	31.6303	31.6363	31.8919	31.7882	0.26861
CNTN1	32.453	31.3154	31.7038	31.6987	31.4641	31.6711	31.4444	31.6786	0.345088
APOA4	31.7711	32.6202	31.1539	31.1351	31.597	31.2629	32.154	31.6706	0.517002
ENPP2	30.5582	30.619	31.8416	32.1618	31.9924	32.1523	31.8185	31.592	0.646764
APP	32.0982	32.1442	31.4789	31.0643	31.3666	31.382	31.5285	31.5804	0.368467
QSOX1	31.5097	31.2004	31.1763	31.4596	31.402	31.2745	30.9858	31.2869	0.170381
HBAA	34.2516	28.6072	31.7259	25.3888	31.0497	34.9086	32.4894	31.203	3.05941
CHGA	31.5916	31.8781	30.9645	30.9201	31.1316	30.9596	30.9729	31.2026	0.35071
C4A	30.1542	26.5562	32.1335	32.2651	32.5156	32.2667	32.4093	31.1858	2.03518
OGCHI	30.8641	32.2561	31.0247	30.9293	30.7056	30.6262	31.4679	31.1248	0.526183
APLP2	31.4025	31.4179	31.1675	30.5726	31.1398	31.0055	30.9295	31.0908	0.271036
CDH2	30.5388	30.9707	31.0512	30.7231	31.0071	30.7515	31.0075	30.8643	0.179594
CNTN2	31.4217	31.4148	30.5778	30.8141	30.5497	30.6883	30.4512	30.8454	0.377288
CHGB	30.9521	31.4902	30.5817	30.5291	30.821	30.5787	30.7882	30.8202	0.308722
NCAM1	30.8783	30.7152	30.6379	30.8062	30.4288	30.5931	30.5761	30.6622	0.140158
SOD3	30.8798	31.0157	30.4434	30.6572	30.428	30.7041	30.2054	30.6191	0.259787
EXFABP	31.5265	31.4271	30.8141	30.5689	29.8552	30.3235	29.7286	30.6063	0.652426
A0A3Q3AGK3	30.0491	30.6114	30.1973	31.4069	30.6246	30.1172	30.718	30.5321	0.436261
HBAD	33.5152	26.8859	31.6225	24.1139	30.8564	34.116	32.4505	30.5086	3.40593
B2M	29.7955	31.3261	30.6581	29.8398	30.957	29.7549	30.7404	30.4388	0.589828
SCG3	30.3503	29.7391	30.7672	30.2321	30.7892	30.3461	30.5691	30.399	0.334937
FN1	30.636	26.1055	31.4151	30.4604	31.6115	31.3387	30.4657	30.2904	1.7648
RELN	30.353	30.9011	30.322	29.804	30.1012	30.3083	30.091	30.2687	0.313291
ITIH2	29.8366	29.8375	30.1505	30.6234	30.214	30.6897	30.5212	30.2675	0.328715
ACTG1;ACTB	30.7399	31.0844	29.806	29.9593	30.1368	30.2725	29.3579	30.1938	0.535184
NELL2	29.5826	30.0226	30.3779	30.3786	29.5576	29.9528	30.2754	30.0211	0.323276
SERPINC1	29.9463	30.7316	29.305	30.5875	29.4841	30.2419	29.7036	30	0.504098
SCG2	30.0081	30.4304	30.154	29.4704	30.193	29.5953	30.0584	29.9871	0.314592
LUM	29.9068	30.7089	29.5155	29.8963	30.0749	30.0843	29.5952	29.9688	0.363809
PLG	29.8106	28.4255	29.8883	30.1952	30.0875	30.2249	30.5415	29.8819	0.634647
ODF2	29.8214	30.489	29.3104	29.9601	29.941	29.7444	29.7295	29.8565	0.32647
IGHM	29.6743	29.5367	29.5567	30.6071	29.5587	29.7485	30.153	29.8336	0.372907
BCAN	30.087	30.4377	29.5431	29.5656	29.5557	29.7603	29.5684	29.7883	0.321589
CACNA2D1	30.1724	30.676	29.4401	29.7685	29.154	29.3651	29.6905	29.7523	0.483892
NPTXR	29.2591	29.0106	29.9129	29.8924	30.0259	29.924	30.111	29.7337	0.390857
CDH13	29.2518	30.5668	29.8792	29.26	29.6948	29.5021	29.7967	29.7074	0.418535
A0A3Q2U9M3	30.8126	30.5003	28.388	29.2444	28.7661	30.0414	30.0762	29.6899	0.839805
MMP2	29.7076	28.6998	29.7574	29.7155	29.6725	29.8576	29.3632	29.5391	0.370661
F1NA58	28.6982	28.0961	29.8769	30.576	29.0211	30.5289	29.9245	29.5317	0.876274
SERPINF2	29.5253	29.9841	28.8692	29.4918	29.1178	29.4163	29.6453	29.4357	0.333427
HRG	29.2385	30.0236	28.8133	28.7018	29.3405	29.1484	30.7369	29.429	0.664915
COCH	28.8855	29.7865	29.9301	28.9884	29.4928	29.4389	28.9681	29.3557	0.386837
A2M	29.2133	29.2198	29.1194	29.3683	28.8654	29.8237	29.0849	29.2421	0.277006
SPIA1	30.6402	30.2139	28.8551	28.7099	28.495	29.043	28.582	29.2199	0.789394
OGN	29.3978	28.367	29.6432	29.2942	29.3357	29.1992	28.9532	29.1701	0.380105
TECTA	28.1897	29.113	29.3415	28.9956	29.283	29.8512	29.3605	29.1621	0.468544
THY1	29.683	29.7582	28.2804	28.9511	28.1383	30.4049	28.4475	29.0948	0.803578
DKK3	29.1331	29.2692	29.116	29.0579	29.0835	28.9533	29.0068	29.0885	0.0935894
A0A3Q2UFU8	26.1819	28.3162	31.3784	30.4202	29.156	28.4704	29.4285	29.0502	1.53779
NEGR1	28.9399	29.6478	29.1474	29.1179	28.5611	28.7332	28.9498	29.0139	0.321563
FGA	27.4484	29.0636	29.3732	30.7583	29.8639	29.2897	27.2484	29.0065	1.16745
SEZ6L	28.313	27.9242	29.5443	29.1575	29.3587	29.3036	29.4273	29.0041	0.57985
SPIA3	30.0777	30.1701	28.598	29.6356	27.8963	28.713	27.8432	28.9906	0.905107
FAM3C	28.9053	29.2263	29.1998	28.8239	28.9948	28.6212	29.1462	28.9882	0.205293
VNN1	28.4403	28.9978	28.8972	29.4883	29.0866	29.1862	28.8122	28.9869	0.302037
F10	28.9205	30.0788	28.2769	28.5306	28.3689	28.7702	29.6286	28.9392	0.624922
NRCAM	29.1889	28.5933	28.9293	29.2006	28.8358	28.9812	28.8224	28.9359	0.198722
C7	29.7	28.3442	28.9689	29.1683	28.5336	29.1614	28.4556	28.9046	0.451292
APLP2	29.2891	29.379	28.9361	28.6331	28.7125	28.746	28.5195	28.8879	0.306119
AGRN	28.8874	28.4434	28.9523	29.0241	28.9358	29.0617	28.8446	28.8785	0.190508
LCAT	28.1597	24.3693	30.237	29.8774	30.0933	29.8346	29.4494	28.8601	1.94224
SPARC	28.7218	29.5256	29.0382	28.7828	28.3826	28.6194	28.5584	28.8041	0.349439
ALDOC	29.1099	28.9033	28.842	28.7856	28.5973	28.867	28.4123	28.7882	0.208257
LDHB	25.4359	28.6963	29.1337	29.5689	29.4235	29.4845	29.3492	28.7274	1.37075
ALB	28.2086	29.2686	28.5694	28.7516	28.3604	28.8909	29.0355	28.7264	0.347219
A0A3Q2UDC8	28.8309	27.9728	28.1478	29.4241	29.9293	28.357	28.3279	28.7128	0.669913
CTSB	28.7093	29.6594	28.8706	28.6774	28.337	28.0387	28.5356	28.6897	0.469886
GOT1	27.8224	28.4009	28.7832	28.932	29.003	29.0191	28.763	28.6748	0.398851
PRNP	28.1496	28.8949	28.7352	28.4584	28.8548	28.6816	28.5368	28.6159	0.239608
TPI1	28.7268	28.5277	28.6007	28.6322	28.492	28.3654	28.8043	28.5927	0.136484
ATRN	28.8448	29.7056	28.1653	28.7189	27.8748	28.2225	27.9483	28.4972	0.598148
A0A3Q2U7L8	28.5015	27.7192	29.0662	29.2652	27.7779	28.3483	27.9668	28.3779	0.565676
APOH	27.6756	23.8205	29.407	29.3214	29.6046	29.665	29.0334	28.3611	1.95671
GSN	27.062	23.2222	29.8378	27.8504	31.3489	30.5159	28.5539	28.3416	2.51117
CALR	28.9395	28.9212	28.1246	27.9937	28.0726	28.1936	28.01	28.3222	0.389712
GPR37L1	27.8133	29.4179	28.306	27.1643	28.8998	27.5952	28.7472	28.2777	0.73964
C5	29.1874	22.4463	28.6911	29.3483	29.0926	29.3275	29.6363	28.2471	2.38314
PENK	28.2444	29.872	28.09	27.4293	28.3713	27.3675	28.2335	28.2297	0.767267
PCDHGC3	26.8964	27.9541	28.4108	28.6683	28.2609	28.5661	28.7508	28.2153	0.593195
PIT54	28.7555	29.5361	27.3206	28.4197	27.7065	27.9301	27.7847	28.2076	0.697342
PAM	27.7003	27.9977	28.2822	28.0955	28.5933	27.8443	28.7224	28.1765	0.350218
A0A3Q2TYZ3;A0A3Q2UFX8	28.0902	28.819	27.6935	28.3687	27.7249	28.2585	28.1845	28.1627	0.358543
EFEMP1	28.3134	27.3517	28.8979	27.8442	28.6083	28.217	27.7414	28.1391	0.492441
NPTX2	27.5133	27.6499	28.1615	28.2257	28.1445	28.4344	28.7667	28.128	0.399852
TTR	23.5929	24.7505	30.3569	29.6116	29.6755	29.7717	28.6427	28.0574	2.52048
A0A3Q2U5V5	26.872	30.5363	26.8841	28.2348	27.8392	28.3091	27.6955	28.053	1.14643
COMP	21.6242	31.0768	28.4569	29.0154	28.2551	29.3655	28.5209	28.045	2.7657
NEO1	28.3706	27.5773	27.9933	28.1675	28.2084	28.0022	27.9783	28.0425	0.231559
NGCA	28.4204	27.4495	28.3457	27.642	28.0639	28.1898	27.9177	28.0041	0.332575
PROS1	28.6242	27.2511	27.8267	28.2107	28.2771	28.1739	27.6329	27.9995	0.425383
RPS27A	27.7492	27.446	28.5883	27.5153	28.043	27.9366	28.4441	27.9604	0.404083
MCFD2	27.845	26.3247	29.0225	28.3531	28.2762	27.8398	27.6389	27.9	0.771205
A2ML1	27.7916	27.9653	27.913	28.0009	27.291	28.3584	27.8743	27.8849	0.294356
F1NEQ4	27.7548	28.0097	27.9703	28.1003	27.1892	28.1	28.0158	27.8771	0.300754
CTSD	28.0786	28.2828	28.0093	27.7348	27.8017	27.6419	27.4926	27.8631	0.253652
A0A3Q2U1A2	28.3594	29.598	26.7586	27.8247	26.3386	27.8569	28.2785	27.8592	0.998155
A0A3Q2U8E0	27.5635	29.0494	28.7245	29.0643	27.9324	25.789	26.8496	27.8532	1.13484
NTM	27.7965	28.1811	27.6824	27.6512	27.8492	27.8235	27.8304	27.8306	0.159694
FGG	26.2944	27.7231	27.7237	29.7756	29.0855	27.9591	26.0028	27.7949	1.25865
A0A3Q2U8K0	27.3276	27.8102	28.0934	28.2103	27.0863	28.2877	27.7307	27.7923	0.419073
RBP4	27.5112	27.9451	27.741	27.3548	27.9644	27.3622	28.5355	27.7735	0.389287
PTPRN2	26.9899	27.6982	28.0689	27.3645	28.4508	27.2948	28.282	27.7356	0.508574
BIRC6	26.522	26.8057	28.6889	28.1817	28.4325	27.5985	27.8178	27.721	0.751662
A2M	26.9877	27.5703	28.0343	28.0989	27.5269	28.0208	27.765	27.7148	0.364627
A0A3Q2UFX3	29.7921	30.8093	27.1553	28.214	26.5462	25.4764	25.9954	27.7127	1.84335
LOC423629	27.9996	29.2908	27.6687	27.4117	26.7055	27.4148	27.196	27.6696	0.758063
SPIA4	27.9597	27.7578	27.9034	27.8541	26.8963	27.7286	27.3739	27.6391	0.35115
CNTFR	27.8242	27.9437	27.4864	27.8825	27.4039	27.6798	27.1294	27.6214	0.273641
AHSG	28.294	28.2594	28.0374	27.3335	27.0891	27.0822	27.229	27.6178	0.513155
ITIH3	28.4984	28.2119	27.4098	27.8637	26.778	27.69	26.2759	27.5325	0.726288
CHL1	27.8643	26.6496	27.6218	27.5453	27.4325	27.8576	27.4166	27.484	0.379917
FTH	27.7223	28.7965	27.6374	27.5545	26.7943	26.3973	27.3192	27.4602	0.705881
NRXN1	27.5464	26.0049	27.6912	27.739	27.7257	27.6189	27.6163	27.4203	0.58129
A0A3Q2TV88	28.2185	26.7954	27.4892	27.2707	27.9644	27.3412	26.7001	27.3971	0.517129
CSF1R	27.1705	27.9376	27.3558	27.3451	27.2918	26.7989	27.4953	27.3422	0.317435
IGFBP7	24.8954	24.0748	28.8058	27.7554	28.9947	28.83	27.8851	27.3202	1.85977
VSTM2A	26.9132	27.6137	27.4642	27.1945	27.2525	27.5294	27.1068	27.2963	0.232464
FGB	26.2848	27.5976	27.3511	28.8451	28.3662	27.23	25.1987	27.2676	1.13763
CFD	24.5354	25.4388	28.2317	27.5273	29.1335	28.1355	27.7769	27.2542	1.52592
SERPIND1	28.1505	24.0933	27.7406	27.9869	27.4634	27.8895	27.2687	27.2276	1.30988
SOD1	27.1177	28.4255	27.0197	26.5196	27.2043	26.8103	27.26	27.1939	0.555404
OPCML	27.6822	28.7066	26.7564	27.0625	26.7219	26.5124	26.8864	27.1898	0.708826
A0A3Q2TUE5	26.3678	28.6636	27.577	26.5119	27.7718	26.3041	26.5257	27.1031	0.842504
ACHE	27.6797	24.078	27.5585	27.3134	27.6985	27.5843	27.4262	27.0484	1.21918
NFASC	27.6463	24.7901	27.5163	27.3566	27.5285	27.3076	27.0324	27.0254	0.930865
F2	27.7469	26.0801	26.8264	27.4882	26.9979	26.8992	27.0488	27.0125	0.490486
KNG1	26.8442	26.4122	27.215	26.7343	26.877	27.166	27.7865	27.005	0.404921
BCHE	27.2612	25.8448	27.0848	27.3968	27.6326	27.1305	26.3381	26.9555	0.586608
CTSA	26.9479	27.0427	27.1421	27.0044	26.6689	26.9821	26.7665	26.9364	0.151589
CFBL	25.9747	25.4868	27.0629	27.6645	26.9573	27.4099	27.9921	26.9355	0.837632
FCGBPL	26.9861	24.5278	26.7862	25.56	28.5505	28.2307	27.6187	26.8943	1.33389
GDI2	27.1804	26.0079	26.9639	27.0864	26.8651	27.2638	26.8302	26.8854	0.387347
C8G	26.2026	25.8838	27.3499	26.8372	27.5579	26.8886	26.9591	26.8113	0.548613
NPC2	26.131	27.2448	27.3666	26.4062	26.8391	26.7902	26.7437	26.7888	0.400957
CP	25.5474	22.5514	27.2745	28.0334	27.812	27.815	28.4765	26.7872	1.93573
PEBP1	27.6102	26.3916	27.1665	26.5794	26.4634	25.5323	27.5608	26.7578	0.685856
PTPRG	27.3346	27.7095	26.3008	26.2455	25.9533	26.8878	26.8433	26.7535	0.583203
CADM3	26.175	27.2694	26.4884	27.026	26.5057	26.9018	26.897	26.7519	0.348324
TMSB4X	26.5926	27.5554	26.943	26.1458	26.7634	26.2315	26.9527	26.7406	0.44485
A2M	27.2934	27.1011	26.0283	26.226	25.407	27.6784	27.2997	26.7192	0.77229
SPTBN1	28.4616	28.8934	26.3047	26.0887	25.2709	25.7529	25.9987	26.6815	1.30236
LOC776594	26.761	26.3986	26.6347	26.5861	27.1577	26.5374	26.2394	26.6164	0.270184
ALCAM	27.4548	27.8893	26.8991	26.9031	25.9701	25.3598	25.7131	26.5985	0.869785
IGFALS	26.7337	25.5148	26.8568	26.8842	26.7343	26.4968	26.7987	26.5742	0.448126
PLXNB2	26.5635	27.2111	26.3602	26.6178	26.3108	26.5891	26.3327	26.5693	0.288154
EPHA4	25.7347	26.4321	26.7608	26.6009	26.8114	26.5999	26.8904	26.5472	0.361
SCG5	25.8629	28.3686	26.7667	24.2571	27.4006	26.174	26.9722	26.5432	1.20275
A2M	25.2719	25.5192	27.0815	27.2331	26.0248	27.3957	27.2276	26.5363	0.83614
NLGN4X	26.1706	27.1135	26.102	27.0108	26.5973	26.4295	26.2635	26.5268	0.372185
A2M	26.7789	27	26.1005	26.3903	26.1056	26.77	26.455	26.5143	0.322579
SEMA7A	26.7562	26.4597	26.7256	26.8809	26.1044	26.6152	26.0244	26.5095	0.306715
VNN1	25.4396	26.5764	26.5385	27.2412	26.2483	27.146	26.3595	26.5071	0.558205
A0A3Q3ASJ5	26.2747	25.6909	27.0271	27.3622	26.9369	24.8958	27.3374	26.5036	0.86125
CHIA-M31	27.058	28.1311	27.3374	26.7915	25.3209	26.0904	24.5413	26.4672	1.14301
IL6ST	26.6958	27.6133	26.1087	26.7448	26.0736	26.2708	25.7604	26.4668	0.568777
SEZ6	26.4773	25.6554	26.5705	26.5374	26.7025	26.5237	26.7847	26.4645	0.345152
OLFML2A	26.5614	25.0701	26.8148	27.1299	26.5345	26.7169	26.3105	26.4483	0.610587
DAG1	25.9085	26.3658	27.1327	25.4454	27.1068	26.736	26.4251	26.4458	0.571883
ANPEP	26.0229	27.4343	26.0256	26.4327	26.0872	26.0598	26.99	26.4361	0.521792
CACHD1	26.6894	24.8697	26.5665	26.6698	26.2043	26.9454	26.8894	26.4049	0.665594
CDH11	26.0529	26.6266	26.4699	26.6934	26.4711	26.351	25.7677	26.3475	0.304901
GLB1	26.9644	26.6024	26.2639	25.9145	26.7013	26.2075	25.7742	26.3469	0.398835
COL1A1	26.9526	26.5403	26.0239	26.4241	26.4493	26.0817	25.8769	26.3355	0.341291
NRXN3	26.5627	24.465	26.592	26.728	26.6368	26.8656	26.4817	26.3331	0.771225
BST1	26.2041	27.3964	26.2097	26.2215	25.7506	25.982	26.4157	26.3114	0.484191
ENPP6	26.6009	27.2632	26.3918	26.5058	25.998	25.6422	25.3359	26.2483	0.598044
MINPP1	25.9828	25.5096	26.4724	26.3984	26.4306	26.3674	26.3405	26.2145	0.324457
FETUB	26.0836	27.4106	26.463	25.0004	25.5741	25.7284	27.2409	26.2144	0.817961
MATN3	27.0359	27.3358	26.4739	26.5123	26.366	25.339	24.3672	26.2043	0.947881
PPIA	27.2389	24.8248	27.0056	25.3999	26.2134	24.9818	27.5546	26.1741	1.0402
LICOS	25.7322	27.5263	25.4429	26.2479	26.0549	25.7278	26.0901	26.1175	0.628135
IL1RAP	25.8572	26.9488	26.1535	26.5226	25.6294	26.2675	25.4189	26.114	0.488859
PRKAG2	25.933	27.1987	25.6691	26.7625	26.0929	25.2056	25.926	26.1126	0.61977
LOC769726	25.7641	26.7945	26.3088	26.1858	26.3084	25.6085	25.8058	26.1109	0.381109
AMBP	25.8046	26.7634	25.8898	25.8096	25.948	25.9253	26.0803	26.0316	0.311007
CTBS	24.3474	23.743	27.0341	26.7516	26.6562	26.6409	26.8623	26.0051	1.25607
GPX3	26.8248	24.3389	25.5059	25.9997	26.9865	26.4335	25.839	25.9898	0.834095
ACTA1	26.8322	24.1962	26.4634	26.3675	26.5897	26.3522	25.1201	25.9888	0.889717
PTPRZ1	26.8304	26.9707	25.964	26.2919	25.2558	25.0885	25.4964	25.9854	0.692311
CFI	25.6995	24.9654	26.0684	26.4514	25.8263	26.3726	26.3493	25.9619	0.485492
MDH1	26.6293	26.001	26.3008	26.1697	24.4418	26.1688	25.8552	25.9381	0.650916
GAAGSD	25.6321	26.1134	26.0629	25.9124	26.0114	25.9419	25.7851	25.9227	0.154805
ENO1	26.8704	25.0546	26.1848	25.8398	25.0491	25.1701	27.2651	25.9191	0.833139
A0A3Q2UHW8	25.2799	25.1619	24.4341	25.7661	26.741	27.911	25.9714	25.8951	1.05913
TIMP2	26.4617	24.6843	25.9515	26.0179	26.0944	26.1638	25.7649	25.8769	0.525363
IMPAD1	25.6973	25.0551	25.9164	26.0771	26.3722	25.8951	26.115	25.8755	0.387586
A2M	24.4731	27.2655	25.7398	25.9179	25.7267	26.3815	25.5695	25.8677	0.7829
OLFML3	25.5232	25.1432	26.5419	24.3931	27.0551	26.2334	25.95	25.8343	0.829384
PHLDB2	27.5835	28.1666	25.6052	26.2698	26.3386	20.9178	25.9285	25.83	2.17703
NTRK2	26.3193	27.1716	25.8995	25.5937	25.3376	25.1399	25.2511	25.8161	0.671101
NPTX1	25.7889	22.9296	26.7197	26.2188	26.7626	26.6016	25.5842	25.8008	1.24651
A0A3Q2UDA5	27.1419	26.9401	24.4689	25.5549	26.3506	23.4577	26.6806	25.7993	1.28159
PGLYRP2	25.5683	26.4542	25.6853	26.6639	25.6867	25.4347	24.8508	25.7634	0.570584
ENO2	28.2424	25.2576	25.9732	24.1774	25.6463	24.7796	26.2395	25.7594	1.20527
NUTF2	25.7785	26.371	25.82	25.2424	25.6494	25.8035	25.6416	25.7581	0.31013
EFCAB14	25.0926	26.1483	25.8422	25.4715	26.1561	25.7524	25.7983	25.7516	0.347258
LOC422894	25.6754	25.689	25.7323	26.1191	25.3824	25.5839	25.8649	25.721	0.212421
PTPRF	25.0112	23.9964	26.7631	25.5912	26.5892	25.5334	26.2306	25.6736	0.895513
FBLN1	25.9569	24.5933	26.5866	26.2202	26.2849	26.0297	23.9905	25.666	0.90336
SS2	25.7542	25.1919	26.4086	24.4393	26.0552	25.5861	25.9835	25.6313	0.602253
DOCK9	25.5728	26.3122	24.1651	26.0151	25.9033	26.009	25.3642	25.6202	0.660227
TFR2	24.1126	26.4649	26.1996	25.9616	25.0952	26.1195	25.3505	25.6149	0.759332
OMG	23.9091	23.9109	25.6514	26.3196	26.8362	26.1267	26.3334	25.5839	1.10675
RCJMB04	24.6684	25.3682	25.7754	25.5297	26.2503	25.7929	25.3899	25.5393	0.452899
FGFR2	25.994	26.5914	25.3203	24.7963	25.4447	24.7845	25.7035	25.5192	0.599589
GST2L	25.6466	25.2459	25.3019	25.2769	25.5702	25.5459	25.8906	25.4968	0.218636
ADIPOQ	25.8005	25.7912	25.7152	25.4252	25.0348	25.5928	25.0889	25.4927	0.297766
SOD2	26.0294	23.8908	26.0231	25.286	26.0932	24.9358	26.087	25.4779	0.774663
SEMA6D	25.5324	25.5855	25.2699	25.3235	25.361	25.5887	25.5277	25.4555	0.123395
APOB	24.366	25.8608	25.1104	25.1037	24.3331	27.8476	25.5323	25.4506	1.10725
ATP6AP2	23.7739	26.2194	26.2351	26.0128	25.7288	24.7253	25.2689	25.4235	0.842197
CAMK2A	26.1753	26.037	24.611	25.1755	24.9925	25.084	25.7871	25.4089	0.547062
LOC101750889	26.8044	27.8037	24.5486	24.3487	24.095	24.2624	25.686	25.3641	1.34432
PTPRS	25.338	24.6416	25.4461	25.4985	25.5476	25.6715	25.3446	25.3554	0.310638
FAM20C	24.5174	22.602	26.3221	25.5886	26.5555	26.2538	25.4711	25.3301	1.28335
A0A3Q3A7G1	26.2055	23.6949	25.6863	24.7363	25.1981	25.8785	25.8427	25.3203	0.801792
YWHAE	27.0332	24.7915	25.2127	24.273	24.6992	25.4972	25.6895	25.3137	0.834528
CAMK2B	25.1497	25.3917	25.1509	24.6669	25.4254	25.0987	26.1206	25.2863	0.410992
A0A3Q2U474	25.7972	26.4369	25.1556	24.5335	26.556	24.4571	23.9696	25.2723	0.941165
PVALB1	26.0334	26.3297	26.4115	24.4089	24.7522	23.0055	25.8923	25.2619	1.16701
SPON1	25.2519	22.1435	25.7517	24.9229	26.2735	26.0938	26.1716	25.2298	1.34244
H2B-VIII;H2B-V;H2B-I	26.9176	26.661	23.8016	24.5043	24.2942	25.4474	24.9667	25.2275	1.09905
CADM1	25.1078	26.5291	24.8026	24.678	24.9165	25.2022	25.1553	25.1988	0.571701
NID1	26.2189	26.6618	25.0951	24.4866	24.6667	24.5307	24.6586	25.1884	0.82111
GGH	25.8799	25.9692	25.039	24.5681	25.0007	24.8283	24.9745	25.18	0.493517
PGAM1	25.6033	23.7669	25.7913	25.7539	24.8299	24.9573	25.4204	25.1604	0.666157
HSPA8	27.4379	23.9454	24.87	23.8199	24.8436	25.8835	25.3044	25.1578	1.14571
VCAM1	24.456	25.512	25.4345	25.3953	24.9515	24.8937	25.1784	25.1174	0.34891
LOC776376	25.283	25.7969	23.8706	25.4381	23.5112	24.7216	26.9136	25.0764	1.07555
NME2	26.1345	23.9207	25.3531	24.155	25.3033	25.7315	24.9347	25.0761	0.744639
CDH6	22.6008	26.1616	24.9244	25.3953	25.3141	25.5903	25.4179	25.0578	1.06003
GRN	24.9727	25.8947	25.0742	24.5985	24.623	25.1674	24.6378	24.9955	0.42579
APOC3	26.3367	26.5354	24.8219	21.2679	25.1823	23.0666	27.4916	24.9575	2.00255
JCHAIN	26.2233	26.2915	23.8053	24.9901	24.2173	24.103	25.0454	24.9537	0.925506
LMAN2	24.9945	26.3469	25.0866	24.4904	25.246	23.3672	25.1007	24.9475	0.827964
CPE	25.0307	24.5281	24.5626	25.3157	24.9485	25.3533	24.3577	24.8709	0.366086
AVD	21.7246	23.2583	25.9546	23.592	27.8499	26.9318	24.6765	24.8554	2.01664
ADAM9	24.3203	26.0833	25.3	23.939	24.7116	24.7116	24.854	24.8457	0.640557
LOC101748084	25.4816	25.9031	23.3728	25.4974	24.2993	23.7142	25.4576	24.818	0.93079
CPN2	23.5918	24.855	25.8716	25.7525	24.1653	25.333	24.1503	24.8171	0.8129
PLXNB3	24.3676	24.5587	24.4906	25.7628	23.739	26.245	24.4319	24.7994	0.812148
NCAN	24.797	26.0668	25.2763	24.2397	25.0818	23.8167	24.2845	24.7947	0.702794
CALM	26.3681	26.0058	24.4541	23.4213	24.3734	23.7209	24.8492	24.7418	1.0183
FSTL1	25.0878	24.9774	24.7265	24.6136	24.6803	24.8151	24.2555	24.7366	0.249966
GPI	24.6778	24.0671	24.6005	25.5342	24.1686	24.3583	25.6897	24.728	0.595215
CADM2	24.1471	25.017	24.6365	24.9392	24.4788	25.1186	24.685	24.7174	0.313874
CNTN4	25.8054	21.4723	25.3995	25.2348	25.0786	24.7175	25.2602	24.7098	1.35605
CACNA2D2	25.095	25.3564	24.8118	24.2155	24.7674	23.9826	24.6168	24.6922	0.440734
COLEC12	23.4142	25.8994	24.8614	24.7205	24.7157	24.5102	24.6612	24.6832	0.671246
CD109	23.1147	22.8947	25.2107	25.616	24.583	25.728	25.5885	24.6765	1.11663
CLSTN1	24.3334	25.4036	24.5549	25.0004	24.5611	24.6181	24.1189	24.6558	0.394732
GSTM2	25.7047	26.0731	23.7051	23.2275	24.5817	24.0546	25.0845	24.633	0.971002
COL1A2	25.4375	25.6108	24.0906	24.7001	24.8029	24.2689	23.421	24.6188	0.710244
MIB1	24.0746	21.4461	24.8273	25.5927	25.4387	25.9692	24.9391	24.6125	1.4118
LOC422895	24.91	25.9307	24.1918	25.1142	23.4602	24.1395	24.1721	24.5598	0.754118
FGFR1	24.9239	24.1702	24.3501	24.4411	24.7501	24.6333	24.6453	24.5592	0.236439
PLXDC2	25.5443	25.1036	24.1246	24.6256	24.7642	23.7252	24.0205	24.5583	0.596139
LMAN1	26.0498	24.5633	24.7425	23.4466	24.642	23.9176	24.5338	24.5565	0.747626
LAMP2	24.6137	26.0475	23.8759	24.7469	24.0281	24.2269	24.0109	24.5071	0.696341
GPLD1	23.446	21.6285	25.4238	25.7652	25.3781	24.3588	25.5402	24.5058	1.39811
FUCA1	24.8631	25.0614	22.5081	25.5639	24.651	24.7025	23.9744	24.4749	0.916675
DDX4	24.2817	24.1532	24.0469	24.2228	24.1381	24.1833	26.1338	24.4514	0.690151
RCJMB04	24.4359	23.7861	26.1671	21.5556	25.1272	23.3094	26.3522	24.3905	1.56388
A0A3Q2U0N4;A0A3Q2U4V6	21.6931	23.1732	25.5091	26.0509	24.1261	24.8378	25.2456	24.3766	1.40234
CYTL1	25.3589	23.5066	24.3613	24.2734	24.6808	24.2657	24.023	24.3528	0.528963
PCDB1	23.8405	25.0317	24.6542	24.1689	24.0543	24.3919	24.2334	24.3393	0.368711
PCDH17	23.6125	24.7019	23.6245	24.613	24.3289	24.8156	24.665	24.3374	0.474866
CTSH	24.8486	25.5292	24.1805	23.2639	24.4172	23.9305	24.1487	24.3312	0.661804
MCAM	23.7373	24.8189	24.2835	24.4041	24.4325	24.0047	24.4716	24.3075	0.323101
MAN2B2	25.6589	25.455	23.8485	24.1586	24.5037	22.8163	23.6766	24.3025	0.928592
GNS	25.3658	23.757	23.9248	24.9432	23.8901	23.8904	24.3001	24.2959	0.575808
TXN	26.2699	24.1427	24.2657	22.3505	23.7496	24.6538	24.5584	24.2844	1.08232
PLOD1	24.2881	21.5516	23.529	25.2093	25.1642	25.2295	24.8043	24.2537	1.24356
NXPH1	23.8108	22.9957	23.9584	24.15	25.1383	24.5423	25.0816	24.2396	0.699653
TUBA1A1	25.4849	24.5368	25.7503	21.6212	24.1086	24.1992	23.7815	24.2118	1.25361
A0A3Q2TTN1	27.6529	25.2528	22.4276	24.3103	21.8633	21.8674	24.8694	24.0348	1.97641
TYRO3	22.7625	26.0309	24.9214	24.035	23.1034	24.147	23.2371	24.0339	1.06272
COL5A1	24.4955	24.6744	24.3655	23.9444	23.4078	23.3633	23.9763	24.0325	0.47604
LOC419409	25.7948	24.8677	22.9072	23.0377	24.2306	23.3347	23.8156	23.9983	0.972801
YWHAZ	25.1135	23.768	24.2061	24.018	23.308	22.9262	24.6161	23.9937	0.691541
CDH4	23.6481	24.6839	23.0081	24.5858	24.4449	23.6793	23.7707	23.9744	0.56913
ARSA	24.482	25.1968	24.1339	23.379	22.9882	23.196	24.1264	23.9289	0.728907
A0A3Q2UBN3	23.6714	25.5672	24.8326	23.4508	23.8314	23.3818	22.7167	23.9217	0.892297
MPZL1	22.7389	24.1594	24.5299	23.555	24.3415	23.9297	24.0522	23.901	0.554215
HEG1	23.5673	24.9356	23.3841	23.3367	24.3344	23.6051	24.0006	23.8805	0.541135
H2A2BL	25.62	25.9879	21.3697	23.3585	23.4825	23.1851	24.1509	23.8792	1.45203
LCP1	22.8748	21.375	24.8644	24.1398	25.2935	24.605	23.6066	23.8227	1.24772
F9	23.3904	21.0018	24.3179	24.9763	25.0815	24.6575	23.226	23.8073	1.32858
DSC1	24.218	23.5551	24.1703	23.3929	23.6317	23.4778	24.0018	23.7782	0.317827
TNC	23.8114	19.8001	24.3837	24.5156	25.0527	24.3676	24.2092	23.7343	1.64232
GOLM1	22.998	22.8419	24.1725	22.9912	24.4028	24.4443	24.2105	23.723	0.682385
YWHAG	25.2893	23.4347	23.5576	22.6122	23.6729	23.5556	23.847	23.7099	0.740879
NID2	23.4094	24.5422	24.4269	22.685	23.9361	23.5711	23.1997	23.6815	0.617899
FAM234A	23.4861	23.7776	23.4981	24.4015	23.8485	23.1759	23.4097	23.6568	0.36889
BLB1	22.9804	24.7687	23.5035	23.4898	23.763	23.4302	23.6015	23.6482	0.508536
AMY1A	23.638	25.4785	23.4194	22.888	24.0942	22.8194	23.1346	23.6389	0.856029
VCAN	24.796	25.127	22.9796	23.1985	22.6725	23.4987	22.8302	23.5861	0.907905
GLB1L	23.5754	24.2842	24.1733	22.6575	22.687	23.7542	23.7986	23.5615	0.60618
FABP7	23.5072	22.7531	24.1587	23.0336	24.0736	23.2876	24.0797	23.5562	0.520614
SORT1	22.1016	23.8658	23.633	23.3654	23.5705	24.3647	23.9561	23.551	0.661986
B3GNT2	22.0636	22.2944	23.4764	24.291	23.7428	24.077	24.5945	23.5057	0.904958
BTD	22.8768	22.8397	23.9476	23.4395	23.6972	23.6846	23.8166	23.4717	0.413345
LRP1	24.5727	24.1028	22.9276	24.1543	23.3725	22.6296	22.3954	23.4507	0.778888
NUCB2	25.2697	24.8953	23.8648	21.5085	23.6685	22.9434	21.614	23.3949	1.36254
IGFBP2	20.8348	20.0524	25.428	21.734	25.5349	24.5245	25.5377	23.378	2.2381
FOXN2	23.3763	28.6433	22.4051	22.4236	22.1756	22.2715	22.3164	23.3731	2.18364
SLITRK3	23.8984	24.9315	23.8941	21.7849	23.6626	22.7155	21.6261	23.2162	1.12721
MARCKS	23.2282	22.5343	21.5915	23.2911	24.4193	23.5047	23.9308	23.2143	0.857889
CLSTN3	22.5387	23.4512	23.2959	23.144	23.1419	23.2193	23.5448	23.1908	0.301131
LAMC1	22.4049	23.1797	23.5227	23.7015	23.7649	22.0886	23.5151	23.1682	0.613518
VWF	25.3333	22.4926	23.2922	22.3434	22.4846	22.6703	23.5446	23.1659	0.97808
PLGL	22.5914	20.9966	23.5034	23.9165	23.7456	23.2882	23.8578	23.1285	0.966079
PDIA3	21.7359	20.852	23.0842	24.1138	24.2767	24.6371	23.093	23.1132	1.2922
SYNE2	23.0371	24.0132	23.4635	23.3117	22.0798	23.3465	22.4361	23.0983	0.604411
SERPINI1	26.1093	26.366	22.2526	20.9343	20.7095	21.918	23.3616	23.093	2.14844
SELENOP1	22.767	22.6609	24.3943	23.17	23.9713	21.5796	22.9072	23.0643	0.852137
CDH5	23.1197	24.3075	23.9902	20.7872	23.0917	22.9481	23.1919	23.0623	1.04346
GRP	23.435	22.4599	24.0366	21.0455	24.1299	21.2977	24.3778	22.9689	1.2785
CNTN3	24.6661	24.112	23.5481	23.3898	21.9726	20.608	22.3416	22.9483	1.29043
F5	21.8634	21.0218	22.8623	23.6172	25.3522	23.577	22.0025	22.8995	1.33069
PRKCSH	23.5734	24.6807	22.5563	22.5993	21.9428	22.4955	22.3595	22.8868	0.862209
ADGRL3	22.8547	24.0658	22.7712	23.7275	20.709	23.2306	22.8199	22.8827	0.998319
SORCS1	23.2802	23.1098	22.2892	22.4833	22.4224	22.6767	23.6473	22.8441	0.470546
GAPDH	24.5735	25.5152	21.2946	23.1563	21.8229	21.9281	21.5846	22.8393	1.51622
DNASE2	22.9451	23.829	22.6075	23.2962	21.3395	21.9217	21.7801	22.5313	0.828278
PEPD	21.3305	23.6742	21.7393	23.2843	21.4477	21.5349	23.0501	22.2945	0.924727
CBLN1	20.9116	22.7603	20.9034	21.4001	21.6799	21.5913	22.235	21.6402	0.626075
PCSK2	21.1171	22.0038	20.6016	21.2474	20.9131	20.344	20.83	21.0081	0.493914

## Sheet: CSF MU x MU
Supplementary Table S2. Core proteomes of CSF and PL
Gene.names	MU1-CSF	MU2-CSF	MU3-CSF	MU4-CSF	MU5-CSF	MU_CSF_AVERAGE	MU_CSF_STDEV
APOA1	34.935	36.2926	35.0536	33.6256	34.9926	34.9799	0.844396
TTR	33.2023	35.7473	34.3174	34.2155	34.2087	34.3382	0.813404
ALB	33.0041	34.7109	32.1335	32.7276	33.795	33.2742	0.895345
PTGDS	31.1149	34.1276	32.517	31.1216	32.4054	32.2573	1.11194
TF	30.3685	34.3758	31.9583	28.1352	31.6383	31.2952	2.04411
HBAA	31.1201	30.2525	30.9101	28.226	28.7683	29.8554	1.15813
HBB	31.1176	30.4568	30.8193	26.7903	29.1721	29.6712	1.58595
A2ML1	28.206	31.3555	28.9858	27.9044	28.8756	29.0655	1.21437
A2M	27.7447	30.4195	30.0831	27.3317	28.4255	28.8009	1.23927
OGCHI	24.374	31.1828	31.6022	27.0238	28.9983	28.6362	2.68996
CHGB	27.188	31.3773	28.1954	27.7384	28.3482	28.5695	1.46095
AGT	28.846	30.4733	27.332	27.433	28.6354	28.544	1.14238
VTN	27.3403	30.2258	29.0068	27.019	28.7398	28.4663	1.16837
APOA4	27.4802	29.9913	27.759	27.6083	28.3108	28.2299	0.925122
CLU	27.714	30.6855	27.9292	25.9237	28.5985	28.1702	1.53774
CHGA	26.8804	30.3558	27.8209	27.5362	27.8611	28.0909	1.18564
PIGS	31.1984	30.1262	24.3758	27.4098	26.5403	27.9301	2.46333
TTR	27.9168	28.3381	29.277	26.8208	26.8359	27.8377	0.934445
GAPDH	31.0689	29.3385	25.3508	27.3659	25.9433	27.8135	2.13009
ADIPOQ	27.229	30.6242	27.1441	24.9955	27.9534	27.5893	1.81103
ENO1	31.5975	29.4296	24.0222	26.7922	26.0618	27.5806	2.65122
NCAM1	27.1248	29.8689	27.2802	24.7829	27.6768	27.3467	1.61848
CKB	32.4359	30.3954	19.9488	27.3423	26.4434	27.3132	4.25992
HP	22.4266	30.1548	31.0337	24.8377	27.8785	27.2663	3.23212
MINPP1	26.8024	29.6354	27.1965	24.8504	27.6778	27.2325	1.53838
SOD3	28.7722	29.0624	26.2572	25.5125	26.3449	27.1898	1.44275
HSP90AA1	30.6805	28.6485	24.2147	26.2788	25.1746	26.9994	2.36108
PKM	30.4971	29.4849	23.7703	25.6041	25.4939	26.9701	2.57087
SCG2	25.2639	29.2352	26.7029	26.7344	25.9435	26.776	1.34418
THY1	25.2129	28.5336	27.3488	25.1095	26.9675	26.6345	1.30952
CACNA2D1	25.5197	29.1901	26.2031	25.2509	26.8088	26.5946	1.40688
SLC3A2	25.4646	28.4753	26.3039	25.8758	26.8254	26.589	1.04578
PVALB	29.8265	28.3516	24.5135	25.7168	24.4692	26.5755	2.1517
LUM	25.3935	28.9487	26.5868	25.0889	26.4598	26.4955	1.35799
SOD3	25.3333	28.3955	25.9654	25.7229	26.9412	26.4717	1.09861
AHSG	25.1563	27.3921	27.0547	24.789	27.955	26.4694	1.26089
YWHAE	28.7319	28.6077	23.6433	26.0158	25.2963	26.459	1.96263
CALM;CALM1;CALM2	29.7255	28.6566	23.1555	25.8531	24.3089	26.3399	2.50326
GPX3	25.0167	28.0105	25.9973	25.245	27.1426	26.2824	1.1389
ENO2	31.3127	29.3524	18.0248	26.9788	25.7165	26.2771	4.55461
HSPA8	30.188	29.1167	23.7957	24.0863	24.0512	26.2476	2.80236
APP	24.347	28.7305	26.4581	24.578	26.8809	26.1989	1.61234
CDH13	25.0809	28.6376	25.9695	24.535	26.2968	26.104	1.41298
ITIH3	24.8944	28.0572	27.415	23.4076	26.2888	26.0126	1.68878
SCG3	24.7791	28.499	25.3885	25.5582	25.4325	25.9314	1.31175
LSAMP	25.7136	28.7749	25.5976	23.8529	25.6243	25.9126	1.59105
YWHAZ	29.0433	27.8986	23.4816	25.2071	23.9288	25.9119	2.19492
PGAM1	29.5279	27.6155	23.2971	24.2199	24.6993	25.872	2.32981
CDH2	25.3562	28.8993	25.4207	24.1598	25.2362	25.8144	1.60956
TPI1	29.0076	29.813	23.5157	22.6414	23.9088	25.7773	3.00539
SERPINI1	25.0667	27.914	25.2465	24.4908	26.0072	25.745	1.18785
SERPINF2	25.2898	28.1112	26.485	22.7798	25.9206	25.7173	1.74199
VNN1	25.0997	27.4196	25.7913	24.1822	25.8589	25.6704	1.06305
ITIH2	25.988	27.3071	25.5823	23.9157	25.5567	25.67	1.08438
APLP2	24.2165	28.0385	25.776	23.7021	26.435	25.6336	1.56108
PENK	24.1208	26.9984	25.4594	25.7042	25.4011	25.5368	0.915824
SPIA3	24.569	27.4633	25.8233	23.7396	26.0346	25.526	1.28117
NTM	25.0302	27.9839	25.3413	23.6306	25.4718	25.4916	1.40791
ACTA1	27.9309	25.8193	24.2586	24.9506	24.3703	25.4659	1.35092
CNTN1	26.4686	28.7084	24.3547	22.3519	25.2564	25.428	2.12074
QSOX1	25.5074	28.1759	24.4473	23.2285	25.7385	25.4195	1.6403
RPS27A ; UBB ; UBA52	25.5349	27.6334	24.8297	24.4045	24.6084	25.4022	1.1789
GPR37L1	23.8744	27.7425	24.979	24.7801	24.8259	25.2404	1.30986
NPEPPS	28.3867	27.4498	22.4438	23.9415	23.9468	25.2337	2.27868
PGK	29.167	27.6943	22.681	23.1043	23.4285	25.215	2.67704
TUBB4B	29.7106	27.8785	21.6895	24.4253	22.3593	25.2127	3.11486
SERPINC1	24.9884	27.5007	25.9687	21.165	26.2812	25.1808	2.16228
YWHAB	27.6411	27.4784	22.4545	24.4447	23.8013	25.164	2.05951
RELN	24.3926	29.2616	23.3429	22.1231	26.3665	25.0973	2.50491
CHGA	23.5861	27.4944	24.4611	24.4527	24.9912	24.9971	1.32749
SPARC	23.7812	26.1089	25.2191	24.3031	25.5588	24.9942	0.843913
LDHB	28.655	28.0895	22.2168	21.7402	24.2025	24.9808	2.8952
NRCAM	26.2322	27.6059	23.8049	21.8041	25.2124	24.9319	1.99865
C4A	25.1987	29.1384	25.8062	19.0466	25.071	24.8522	3.2605
YWHAG	27.7547	27.1215	21.2917	24.6674	23.3684	24.8407	2.38691
LCN10 ; LCN8 ; AL355987.1 ; LCN6	25.101	29.5337	24.8421	22.003	22.719	24.8397	2.63233
TMSB4Y ; TMSB4X	27.582	27.0287	22.3489	24.72	22.3417	24.8043	2.22549
SPTBN1	26.9989	26.1161	25.8739	25.7859	19.1236	24.7797	2.8605
FTH	27.468	25.7777	23.9975	21.6373	24.7261	24.7213	1.93368
SEZ6L 1	24.4159	27.4249	24.5511	21.9738	25.1501	24.7032	1.7414
CPS1	24.4521	24.652	24.8685	24.9132	24.5386	24.6849	0.180296
GLUL	29.2821	27.461	18.8728	24.641	23.0663	24.6646	3.61224
GOT1	28.6501	28.4939	23.3141	18.7433	24.0512	24.6505	3.68264
H3-I ; H3-II ; H3-III ; H3-IV ; H3-V ; H3-VI ; H3-VII ; H3-VIII ; H3-IX ; H3-X	25.4158	24.4233	24.5565	24.5219	24.3238	24.6483	0.392257
PRNP	24.7188	27.3213	24.7031	21.7498	24.6867	24.636	1.76379
CST3	23.4974	28.732	23.0295	26.1861	21.7341	24.6358	2.50911
IGLL1	26.5481	29.1778	25.1766	18.3765	23.5395	24.5637	3.6037
NID1	22.2542	26.7894	23.9746	23.8119	25.7546	24.5169	1.58791
ATP5A1 ; ATP5A1W	26.9485	25.3206	22.2933	24.5259	23.4375	24.5052	1.5917
MDH1	28.4257	28.2013	22.172	21.0238	22.5254	24.4696	3.17833
FAM3C	23.2623	27.7288	24.7735	22.0665	24.5164	24.4695	1.89472
GC	24.4306	27.1276	22.4135	24.5443	23.4385	24.3909	1.57046
GSN	26.8723	25.3029	23.464	22.2521	23.7767	24.3336	1.59897
MYH1F ; MYH1C ; MYH1B ; MYH1A ; MYH1D ; MYH1E	24.1234	23.8571	24.6312	24.752	24.1777	24.3083	0.33346
VCP ; TERAL2	28.302	26.1469	21.3583	23.5177	22.1633	24.2977	2.5791
CTBS	22.7271	25.9895	23.9779	23.5906	24.5953	24.1761	1.09048
BCAN	24.1326	26.5487	23.8737	21.3281	24.7831	24.1332	1.68484
PYGB	28.9155	26.8658	20.2565	21.8215	22.6379	24.0995	3.25394
KNG1	23.0563	25.8405	24.4206	21.7534	25.4234	24.0988	1.51521
GPLD1	22.4277	26.4546	24.3713	22.6795	24.3846	24.0635	1.4496
GLUD1	26.9	25.2067	21.581	23.8663	22.7141	24.0536	1.8641
VNN3;VNN2	23.8855	25.4484	23.711	23.2143	23.6415	23.9802	0.766601
HSPA5	26.1977	24.9735	22.6996	23.3005	22.707	23.9757	1.38759
YWHAH	26.8146	26.3764	20.3189	23.4609	22.6774	23.9296	2.4139
NEGR1	24.6613	27.9874	23.7693	19.3597	23.5643	23.8684	2.75774
CTSB	23.7057	27.3414	23.9359	20.5128	23.7826	23.8557	2.16145
CACNA2D2	22.8444	26.8107	23.2317	22.5668	23.751	23.8409	1.53721
AHCY	26.8123	24.7195	23.2306	22.1258	22.0883	23.7953	1.7875
SERPIND1	26.0907	26.4561	22.6034	19.8859	23.8911	23.7854	2.41086
LDHA	27.7653	27.905	21.4391	20.5241	21.2899	23.7847	3.32204
HSPA4L	28.2169	26.3661	19.706	22.6511	21.9669	23.7814	3.08327
ALDH2	26.8067	25.0212	21.1044	22.7863	23.0045	23.7446	1.97196
MCFD2	24.4107	26.3236	23.334	20.8953	23.729	23.7385	1.75396
GOT2	27.2193	24.3211	21.8933	23.7696	21.3589	23.7124	2.07462
YWHAQ	26.9836	26.227	19.7727	23.295	22.2466	23.705	2.64077
CA2	27.6336	25.1949	23.9783	19.737	21.9221	23.6932	2.70747
EEF1A2	25.7535	23.1308	22.99	23.5584	22.9205	23.6706	1.06474
NUTF2	24.9804	25.7451	22.9299	22.198	22.4382	23.6583	1.43208
TUBA1A;TUBA1C;TUBA3E;TUBA4B;TUBA4A;TUBA8A;TUBA8B;TUBAL3;LOC425049;LOC100857858	27.7611	26.3254	19.7487	22.841	21.2459	23.5844	3.02295
ASS1	25.6599	23.4135	22.9902	22.8353	22.8617	23.5521	1.07407
CNTFR	22.1866	25.8786	23.8239	21.6231	24.124	23.5273	1.5097
BASP1	26.9001	25.2155	21.69	22.5769	21.2536	23.5272	2.17599
DKK3	22.7497	26.5216	23.2161	21.9271	23.1599	23.5149	1.57238
AMBP	22.7577	24.487	23.3578	23.6835	22.9496	23.4471	0.611225
OPCML	23.0807	25.881	23.4493	20.7683	24.0476	23.4454	1.64892
H2B-I;H2B-II;H2B-III;H2B-IV;H2B-VI;H2B-V;H2B-VIII	24.9079	23.2598	22.8277	23.2921	22.7588	23.4093	0.780174
ENPP6	23.375	24.5168	23.2881	22.1186	23.7068	23.4011	0.774141
TUBB1	27.3503	25.9099	20.1577	22.0717	21.5081	23.3995	2.7481
BST1	20.8338	24.9115	23.6631	23.219	24.2399	23.3735	1.39095
DJ-1;PARK7	26.7124	25.426	20.2717	21.5564	22.6104	23.3154	2.40205
VIM	28.797	25.3718	21.1664	20.6488	20.5336	23.3035	3.27854
GLO1	26.2442	25.1444	21.3557	21.1588	22.4365	23.2679	2.05795
PGM1	27.0951	25.7983	20.6725	20.7617	21.7747	23.2205	2.69391
PRDX6	28.5388	24.0501	19.3903	22.0668	21.9891	23.207	3.04926
ALB	22.1765	25.2226	22.0355	23.1058	23.4225	23.1926	1.14478
PSMA7	26.0885	24.2726	21.2873	22.054	21.7826	23.097	1.81228
NELL2	22.2461	25.4676	22.5796	21.3425	23.124	22.9519	1.38456
CADM1	22.4267	24.2875	22.5645	22.0638	23.1431	22.8971	0.777169
AP2A2	25.075	24.4348	21.5061	21.3754	22.0867	22.8956	1.55017
CALR3	24.0465	23.948	22.2019	21.6017	22.5913	22.8779	0.967319
IDH1	26.346	25.4503	20.0737	20.864	21.5927	22.8653	2.53832
APOC3	22.6103	24.2585	23.7055	21.1936	22.5104	22.8557	1.06131
APOB	25.2743	21.5082	24.3395	21.3778	21.7591	22.8518	1.62812
NME1;NME3;NME4;NDK	26.2733	26.574	20.6139	20.5916	20.1851	22.8476	2.92539
PTPRZ1	24.356	24.102	21.6351	21.4879	22.6325	22.8427	1.20117
HRG	24.111	23.5622	23.3257	21.2862	21.9084	22.8387	1.06347
ALAD	26.3588	23.4754	21.6354	21.3216	21.2725	22.8127	1.94914
LAMP2	21.8204	24.4914	22.6237	22.1367	22.9759	22.8096	0.929733
NPTXR	22.8929	27.5568	21.1003	20.2098	21.9966	22.7513	2.5639
HSPD1	26.4702	22.3637	20.5048	22.8255	21.456	22.724	2.03503
CDH6	22.1528	25.6468	22.8457	19.3905	23.5058	22.7083	2.0301
CTSD	25.6786	26.8515	22.1148	19.4292	19.1699	22.6488	3.14947
PTPRG	21.663	25.6285	22.3221	19.5471	23.5194	22.536	2.01358
HSPH1	24.909	27.835	23.6049	17.3428	18.7332	22.485	3.90564
SERPINF1	20.9779	25.0549	23.3163	20.9723	22.0311	22.4705	1.5531
GSTA1;GSTA2;GSTA3;GSTA4;GSTA5	26.4708	25.8911	19.3082	19.8392	20.8407	22.47	3.07517
PDIA3	24.1531	22.8507	22.3461	21.2538	21.7454	22.4698	0.999736
GM2A	22.9933	26.3686	20.5523	20.9411	21.4633	22.4637	2.12135
CALB1	28.492	24.6267	19.1736	18.9785	21.0179	22.4578	3.6354
CAMK2A	22.7312	24.5856	22.0658	20.5896	22.2441	22.4433	1.2877
ATP5B;ATP5F1B	26.3656	24.5455	17.8207	22.2454	21.2062	22.4367	2.92376
MDH2	26.6897	22.3367	19.744	22.3809	20.9638	22.423	2.34605
CPQ	19.9752	25.2426	22.0789	21.8382	22.8271	22.3924	1.70652
COL3A1	23.4197	25.3339	20.5065	19.5965	22.7695	22.3252	2.05916
ALDOC;ALDOB	22.9819	22.2014	21.7928	21.9475	22.6922	22.3232	0.448833
PPP2R4	22.9875	22.9345	21.4584	21.4317	22.6883	22.3001	0.705433
FN1	23.4476	24.0377	21.4097	19.9018	22.6916	22.2977	1.48553
PGLYRP2	21.9349	23.1738	22.9451	20.5668	22.8569	22.2955	0.961974
GAP43	26.0916	24.9862	19.0333	21.2467	19.9169	22.2549	2.79435
PSMA2	25.0998	23.472	20.2927	21.4774	20.9089	22.2502	1.77996
IMPAD1	22.314	25.8953	21.3238	19.0446	22.4489	22.2053	2.21154
ATP1A1	27.7749	23.7611	19.1977	21.0587	19.1694	22.1924	3.25628
PPIA	25.6706	26.8886	20.0683	19.8232	18.1476	22.1197	3.48167
EXTL2	21.2801	24.6561	21.6483	20.528	22.2247	22.0674	1.40651
SEZ6L	21.6983	24.9345	21.612	20.1398	21.6922	22.0154	1.5752
PEBP1	23.9412	26.1345	19.8513	20.4886	19.6541	22.0139	2.57938
C3	21.6653	26.3942	22.4435	18.8323	20.7162	22.0103	2.50199
SEZ6	21.9374	25.4233	21.4822	19.3913	21.8166	22.0101	1.9406
ESD	25.4942	24.4659	19.3437	20.0133	20.6901	22.0014	2.49033
PRDX1	24.7322	23.7222	21.5678	22.2548	17.7099	21.9974	2.41194
TCN2	22.1456	25.1292	20.1906	19.419	23.0348	21.9839	2.0405
ACAT1	25.7788	24.3964	18.2681	21.2364	20.0163	21.9392	2.77306
PSMA3	24.5888	23.0037	20.2624	21.2169	20.5959	21.9335	1.6304
HSP90B1	25.4399	21.9191	20.4866	21.0589	20.7583	21.9326	1.81849
NEO1	22.0361	24.8723	21.3721	18.8931	22.3584	21.9064	1.91746
SST	18.917	24.4066	22.1038	22.6685	21.3501	21.8892	1.7953
SOD2	24.4723	24.6166	19.8716	21.3959	19.0752	21.8863	2.29536
PSMB3	23.641	23.1572	21.3027	20.0909	21.0323	21.8448	1.34005
LAMP1	21.4853	23.1813	21.4619	20.572	22.4928	21.8386	0.905724
MPZL1	19.5579	24.9136	21.9549	20.3101	22.4264	21.8326	1.86293
BLMH	24.9448	22.398	20.0916	20.5769	21.1264	21.8275	1.73849
NPTX2	19.586	26.5833	22.3468	17.3854	23.1961	21.8195	3.14697
NACA	24.0112	21.1647	21.6365	21.3518	20.8777	21.8084	1.12879
TYRO3	20.6646	24.206	21.1706	20.4761	22.4153	21.7865	1.38597
CPE	23.2304	24.9258	21.0417	18.6908	20.9809	21.7739	2.13198
SLC25A6	24.6092	21.8772	21.4075	20.6923	20.2609	21.7694	1.52599
DNASE2B	18.6434	23.702	22.0674	21.4295	22.9088	21.7502	1.73247
HSP90AB1	22.1925	19.7942	22.1003	22.6354	22.0232	21.7491	1.00022
CCT7	26.8552	22.7521	18.9278	20.6216	19.5196	21.7353	2.87329
ARMH4	20.239	24.3307	21.6398	20.4622	21.8131	21.697	1.45625
BCAT1	25.3223	23.5104	17.1415	21.4779	21.0285	21.6961	2.74514
CNDP2	26.4065	24.0924	16.8358	21.1952	19.8559	21.6772	3.3223
EEF1A1	23.8529	20.3976	20.7862	22.7504	20.3804	21.6335	1.41343
TFRC	21.6866	23.4394	21.5608	19.4189	21.945	21.6101	1.28592
RCN1	24.6695	22.5282	19.8425	20.3526	20.6578	21.6101	1.7785
PLXDC2	19.9886	23.8663	21.8983	19.6649	22.5388	21.5914	1.57781
LMAN2;LMAN2L	20.219	24.7147	21.551	17.8532	23.4863	21.5649	2.41665
PSMA6	24.847	23.4653	19.9478	19.3177	20.2222	21.56	2.1841
CADM2	22.2613	23.5174	21.2429	19.4581	21.3074	21.5574	1.33457
LRP1	20.4065	24.2911	20.5425	20.102	22.2473	21.5179	1.57569
ACO2	25.8684	24.6348	18.6956	18.9205	19.4551	21.5149	3.08574
PAM	19.7634	25.0167	21.3598	19.484	21.8901	21.5028	1.98084
HEPH	20.0083	23.6725	21.7084	20.3285	21.6816	21.4799	1.29552
PSMD1	24.7925	21.146	19.9958	19.5827	21.4801	21.3994	1.83602
ACADL	24.6938	22.4249	19.2545	20.6139	19.9088	21.3792	1.96684
PGD	25.2987	24.0764	18.891	18.718	19.9108	21.379	2.75922
OMG	21.2245	23.2462	20.3457	20.9634	20.7925	21.3145	1.00738
GKN1	20.6663	24.1038	21.3519	19.3075	20.9459	21.2751	1.57213
PTPRN2	21.0998	24.4226	19.3781	21.5991	19.6039	21.2207	1.81212
ALCAM	19.777	23.6669	21.4164	20.0033	21.2099	21.2147	1.3848
HSPE1	24.1163	23.0927	18.9762	20.258	19.5453	21.1977	2.03262
GLB1	21.0146	24.02	20.0955	19.7601	21.0294	21.1839	1.50388
C4orf48	19.6788	22.9423	21.1962	20.1464	21.952	21.1831	1.18521
JUP	20.5528	18.539	21.3703	23.1394	22.2584	21.172	1.57521
PSMA4	23.8236	22.5362	19.1965	20.0125	20.2549	21.1647	1.73089
LY86	20.4346	25.3595	20.8623	20.0727	19.0417	21.1542	2.18722
ALDH9A1	26.5989	24.6827	19.9779	17.2009	17.2142	21.1349	3.86338
GAA;GAAGSD	21.0589	22.7777	20.8816	19.1904	21.639	21.1095	1.16624
C4orf48	19.7141	22.8955	21.3615	19.9711	21.5194	21.0923	1.15436
PSMB1	25.3038	22.6856	18.0795	20.0738	19.0901	21.0465	2.62252
SELENOP	19.9074	22.7827	20.3998	19.852	22.0896	21.0063	1.20309
FGA	19.1962	21.4308	20.9647	23.5919	19.7769	20.9921	1.52673
FSTL1	18.7566	23.3518	19.9118	20.5909	22.0107	20.9244	1.60676
CLSTN1	21.8703	23.8274	19.2994	19.2892	20.2148	20.9002	1.73993
MYH15;MYH7;MYH7B	21.6832	18.4871	21.6428	21.2974	21.3547	20.8931	1.21256
UBA7	22.7414	23.6781	19.3286	18.6423	19.8556	20.8492	1.9876
RAP1B;RAP1A	24.5687	22.3255	18.5952	19.8524	18.7505	20.8185	2.30163
LOC776594	20.1761	23.8983	20.0526	17.8137	22.1509	20.8183	2.06341
PEPD	24.2045	22.6332	17.2132	19.0895	20.9228	20.8126	2.48015
MCAM	19.9216	23.2998	20.8245	19.4258	20.5355	20.8014	1.34012
ARSA	19.3454	24.0094	19.3679	19.6323	21.3409	20.7392	1.7947
NEFM	27.5296	25.3029	15.1674	17.4226	18.0075	20.686	4.82555
CCT4	26.5941	20.4135	18.1501	19.3068	18.9633	20.6855	3.04238
FASN	25.1296	22.551	17.9067	18.5471	19.2843	20.6837	2.73817
CLTC	25.8329	21.1475	17.5181	19.843	18.5867	20.5856	2.89158
MYH1F;MYH1C;MYH1B;MYH1A;MYH1D;MYH1E	20.5055	19.9922	20.8654	20.8075	20.7211	20.5783	0.317546
PCSK2	20.5153	22.7558	19.7384	19.9862	19.4746	20.4941	1.18186
NLGN1;NLGN3;NLGN4	20.0967	23.0634	19.1997	18.6001	21.4793	20.4879	1.61198
ACTN1	24.51	19.9794	18.1639	20.7682	18.8549	20.4553	2.21708
EEF2	21.8172	19.6383	20.1494	20.2488	20.4071	20.4521	0.729489
CD109	19.3616	22.5449	20.0289	19.6321	20.5381	20.4211	1.13339
ANXA2	22.0015	19.0437	19.9018	21.8347	19.0451	20.3653	1.30697
H1-0	25.6114	20.7644	19.1823	18.2607	17.8863	20.341	2.81609
SLC25A3	21.8854	20.3013	19.4474	19.869	19.9696	20.2945	0.840829
HSPA9	23.755	20.997	18.4484	18.2836	19.7298	20.2428	2.01125
BTD	18.5526	21.4535	20.8146	18.316	22.0366	20.2347	1.52181
AARS1	24.5235	20.9484	18.3242	17.7657	19.5461	20.2216	2.41341
SET	20.6308	20.3638	19.74	20.5808	19.6528	20.1936	0.416687
HNRNPA2B1	24.4018	17.3645	19.4699	19.8723	19.5901	20.1397	2.31039
TPM3	24.2588	22.8464	17.7493	18.2507	17.2271	20.0665	2.89937
PSMA5	24.3309	20.4297	18.0792	19.6235	17.7406	20.0408	2.36088
CZIB	19.3288	20.2513	20.22	20.1107	20.2392	20.03	0.354138
PSMB2	23.8426	21.5075	18.0083	18.0841	18.5716	20.0028	2.31153
HEG1	16.1642	23.5219	20.7068	18.5313	20.8275	19.9503	2.46766
CPPED1	24.2855	21.6313	17.5175	18.0468	17.8536	19.8669	2.66547
C5	21.2402	24.7494	18.342	17.2154	17.7007	19.8495	2.82035
ACAA2	23.4326	19.3656	18.2204	18.7748	18.766	19.7119	1.89531
CAT	18.9509	18.78	19.1588	19.2991	20.4562	19.329	0.590734
RPL15	19.5467	18.0583	18.2885	18.4279	17.83	18.4303	0.594191

## Sheet: CSF NH x MU
Supplementary Table S2. Core proteomes of CSF and PL
Gene.names	NH1-CSF	NH2-CSF	NH3-CSF	NH4-CSF	NH5-CSF	NH_CSF_AVERAGE	NH_CSF_STDEV
ALB	33.5963	33.4098	36.3732	37.3236	35.474	35.2354	1.53175
APOA1	34.1393	33.4294	35.921	36.7428	35.1959	35.0857	1.19122
TTR	33.4994	33.3435	35.9477	36.4636	35.3384	34.9185	1.27415
TF	30.6142	28.9581	34.2142	35.5488	33.4416	32.5554	2.41685
PTGDS	30.3678	29.0271	32.4315	34.4885	33.0066	31.8643	1.9392
A2M	28.2452	29.2063	29.8142	32.0128	29.8828	29.8323	1.2384
HBAA	25.6765	28.1562	25.8302	35.9629	33.1711	29.7594	4.1183
A2M	28.2268	26.6132	29.6986	31.7975	29.7868	29.2246	1.73064
HBB	24.617	27.7103	25.4554	34.9667	33.2059	29.1911	4.16047
CLU	27.6495	26.0628	29.8325	31.4661	28.537	28.7096	1.84489
TTR	26.734	26.5855	29.2567	31.493	29.112	28.6362	1.82187
NCAM1	27.3655	25.8974	29.1605	31.5341	29.1771	28.6269	1.90159
VTN	26.5134	27.3577	29.3734	30.8277	28.7335	28.5611	1.51449
PIGS	29.1601	27.2037	28.6075	29.7613	26.8536	28.3172	1.1191
GAPDH	28.7651	28.0001	28.6695	29.4495	26.5858	28.294	0.969791
APP	27.3336	25.6069	28.6225	31.0018	28.8784	28.2886	1.78461
ADIPOQ	26.7329	23.8619	30.0341	31.2058	29.4725	28.2614	2.64463
PKM	29.0839	26.7543	28.397	30.2644	26.7683	28.2536	1.35701
ENO1	29.4213	27.3335	28.6631	29.1624	26.4348	28.203	1.14009
MINPP1	26.3948	25.627	29.3557	30.5381	28.8807	28.1592	1.85129
PSME4	27.0114	26.5394	28.5925	30.478	27.5965	28.0436	1.39683
APLP2	26.6084	24.8665	28.5246	31.3368	28.8748	28.0422	2.18728
APOD	26.0213	24.748	29.1858	30.682	29.4579	28.019	2.24562
CACNA2D1	26.5602	25.6116	28.3645	31.1586	28.2421	27.9874	1.89449
CHGB	26.5891	25.7117	28.3712	30.3235	28.0556	27.8102	1.58657
RELN	26.7496	24.5051	29.0668	30.8029	27.5496	27.7348	2.12713
LUM	26.1357	25.199	29.0711	30.3013	27.7836	27.6981	1.8631
CNTN1	25.6054	22.6636	29.1303	31.9123	29.0468	27.6717	3.20474
CKB	29.4877	26.3624	28.0213	28.6791	25.6118	27.6324	1.44115
TPI1	27.3291	23.7895	28.5785	30.5683	27.5985	27.5728	2.20718
LSAMP	26.2413	24.7418	28.2582	30.535	28.0068	27.5566	1.96056
PVALB	27.4377	24.795	28.0265	29.5512	27.9408	27.5502	1.54839
SCG3	26.2274	24.821	28.1582	30.8755	27.5072	27.5178	2.03087
ENO2	29.5111	26.5427	27.5933	28.685	25.0058	27.4676	1.58682
CDH13	26.2873	23.8742	28.2839	30.7204	28.1416	27.4615	2.28065
APOA4	26.6462	26.0965	28.5059	28.1544	27.4123	27.3631	0.900299
GC	25.9084	24.8083	28.2059	30.567	26.8423	27.2664	1.99214
QSOX1	25.7775	23.9569	28.0044	30.8628	27.5609	27.2325	2.31213
CHGA	25.8555	24.3926	27.7068	30.5425	27.3857	27.1766	2.05669
THY1	25.6221	25.4918	28.238	28.675	27.6106	27.1275	1.32688
CDH2	25.3592	23.0698	27.957	31.2169	27.9015	27.1009	2.74218
C4A	25.6488	23.9761	27.9064	30.0052	27.9221	27.0917	2.07994
NTM	25.5696	23.8533	28.0503	30.2711	27.6538	27.0796	2.19757
HSPA8	27.6284	24.5312	27.2543	29.3599	26.204	26.9956	1.59731
SCG2	26.3497	25.1296	26.4607	29.688	27.3442	26.9944	1.52025
AGT	25.5317	23.6038	27.6503	30.519	27.4999	26.9609	2.31251
SERPINF2	24.7553	25.1949	28.3284	28.9081	27.437	26.9247	1.66524
HSP90AA1	28.3549	26.2145	27.0412	27.7219	24.7553	26.8175	1.25283
ITIH2	24.4449	25.3528	27.8536	29.3364	27.0009	26.7977	1.74497
PGAM1	27.7352	25.2075	26.8931	28.5393	25.5614	26.7873	1.26318
SOD3	24.9037	25.2515	27.6752	28.9608	27.1088	26.78	1.51803
YWHAZ	27.9659	25.3447	26.8578	28.3209	25.3436	26.7666	1.25772
FAM3C	24.8175	22.7163	27.8618	30.4177	27.7311	26.7089	2.67011
SERPINA4	24.244	24.9136	28.3736	28.7486	27.1785	26.6917	1.81379
YWHAE	27.8692	25.4227	26.946	27.8045	25.1337	26.6352	1.15856
ENPP2	23.4007	22.0305	28.3829	31.0223	28.1925	26.6058	3.35822
NRCAM	24.9506	23.2738	27.4297	30.0355	27.0655	26.551	2.30129
SOD1	26.5294	24.5299	26.7572	28.1245	26.4801	26.4842	1.14772
MDH1	26.4063	22.86	27.1827	29.5796	26.1673	26.4392	2.15873
BCAN	25.302	23.1833	27.1438	29.437	26.8589	26.385	2.07552
GOT1	26.2536	23.0495	27.3087	29.4997	25.7989	26.3821	2.09958
PGK	27.6505	25.0537	26.9159	27.7531	24.4204	26.3587	1.36995
NEGR1	24.4346	21.6059	27.8204	30.241	27.3948	26.2993	2.98516
SERPIND1	23.8246	23.2451	26.6109	30.1533	27.4605	26.2589	2.51961
UBB	24.1348	23.978	26.6421	29.4992	27.0107	26.253	2.04577
SEZ6L 1	25.2235	22.6472	27.0014	29.6701	26.6529	26.239	2.30032
CALM2	28.0899	25.16	25.533	27.2573	25.0391	26.2159	1.22984
PAM	24.4909	23.4774	26.4992	29.471	26.5569	26.0991	2.05909
GPI	25.7047	23.9125	27.027	28.8151	24.9679	26.0854	1.70017
LDHB	26.2544	22.7264	26.9673	28.8647	25.5744	26.0774	2.00372
GSN	25.2564	25.0552	25.3847	29.8933	24.3117	25.9803	1.99149
PRNP	24.6735	23.2339	26.8467	29.1313	25.4706	25.8712	2.0065
SERPINF1	22.8604	22.6121	26.307	30.203	27.086	25.8137	2.83199
GPR37L1	25.1996	23.6528	25.363	28.318	26.5145	25.8096	1.54999
BST1	23.9554	23.3864	26.5187	28.3191	26.3571	25.7074	1.80875
CNTN2	23.4418	20.4762	27.4081	29.957	27.1884	25.6943	3.33595
SERPINC1	23.0742	23.0818	27.9937	27.8561	26.3861	25.6784	2.19673
GPX3	24.4791	22.0038	25.9678	29.4204	26.5043	25.6751	2.43759
FN1	22.3894	24.7881	25.3464	30.0251	25.6753	25.6449	2.47422
NPTXR	24.0525	20.7979	26.6583	30.7208	25.9241	25.6307	3.25262
NPTX2	24.3121	21.7324	26.6333	29.5684	25.8634	25.6219	2.58844
UCHL1	27.0172	23.8441	26.5664	27.2873	23.22	25.587	1.70505
YWHAB	27.3535	24.3556	25.7057	26.9129	23.5066	25.5669	1.46527
CTSB	23.9099	21.7808	27.6205	28.1191	26.2228	25.5306	2.37635
FTH	24.6135	23.5593	26.1095	27.1757	26.1063	25.5129	1.27267
SPARC	23.8517	22.9195	25.9755	28.6329	25.7076	25.4174	1.97111
CTBS	24.5371	23.7069	24.5734	28.3491	25.8951	25.4123	1.62701
YWHAG	27.2724	24.5303	25.1609	26.2656	23.7154	25.3889	1.25744
APOB	24.2887	26.3246	26.4844	27.3057	22.5372	25.3881	1.73739
OPCML	23.6361	21.1507	26.3599	28.9594	26.5812	25.3374	2.68829
AP2A2	23.7159	22.8897	26.3456	28.4315	25.3015	25.3368	1.96022
CTSD	24.824	19.1459	26.7089	29.0503	26.8276	25.3113	3.36101
CACNA2D2	24.0588	22.5128	25.5147	28.6794	25.4629	25.2457	2.03897
PTPRG	23.7814	21.7045	25.962	28.9953	25.7584	25.2403	2.42981
C3	20.2887	24.9183	26.1993	28.6967	26.0398	25.2286	2.76139
HBAD	19.7849	24.2497	20.8862	31.648	29.4876	25.2113	4.66464
NELL2	23.5043	21.9273	25.4534	29.084	25.9483	25.1835	2.42051
VNN1	25.1779	24.3981	27.6793	24.5401	24.0398	25.167	1.30892
ITIH3	23.161	24.4059	25.3276	27.6477	25.1131	25.131	1.46829
GDI2	25.176	20.1668	26.0219	28.7966	25.4727	25.1268	2.79257
LDHA	24.7987	20.7141	26.6691	28.5925	24.8265	25.1202	2.60996
SEPP1B	24.0143	22.7054	25.2871	28.1521	24.9917	25.0301	1.8028
TMSB4X	25.8477	22.9554	24.6795	26.4287	24.9627	24.9748	1.18666
CNTFR	23.3495	21.6461	25.3144	28.2298	26.2252	24.953	2.28005
BTD	23.8391	22.8955	25.5783	27.2466	25.1606	24.944	1.49455
NPEPPS	25.3831	22.93	24.6225	27.2206	23.9841	24.828	1.44149
CDH6	23.1155	21.2607	25.4065	28.5895	25.6961	24.8137	2.48575
PYGB	25.755	23.685	25.1308	26.1424	23.2999	24.8026	1.12402
OGCHI	23.6032	24.4271	25.271	25.6475	24.2291	24.6356	0.735148
NUTF2	23.9096	22.2866	25.3062	26.8489	24.6108	24.5924	1.50895
KNG1	22.9884	22.4556	26.2772	26.7773	24.4202	24.5838	1.71931
NME2	24.311	21.5309	25.3217	27.3367	24.3255	24.5651	1.87523
PENK	23.9424	23.1524	23.4963	27.4174	24.7625	24.5542	1.52968
LAMP2	23.4052	22.3578	24.9269	27.1963	24.8594	24.5491	1.63444
GPLD1	22.9607	22.3153	25.3755	27.2277	24.6776	24.5113	1.75385
VCP;TERAL2	25.7747	23.5626	23.8484	25.4782	23.5384	24.4405	0.979005
LCN10;LCN8;AL355987.1;LCN6	21.6753	18.454	25.2792	30.3681	26.334	24.4221	4.07205
HP	21.2941	26.5785	24.0775	26.5675	23.5893	24.4214	1.99244
PTPRN2	23.5524	21.7664	24.6942	27.5111	24.5562	24.4161	1.86779
PTPRZ1	23.9333	21.7293	24.6936	27.0122	24.3197	24.3376	1.68803
YWHAH	26.4425	23.3597	24.2189	25.158	22.4826	24.3323	1.37946
HIS3;HIS4	25.0671	24.3833	23.1672	24.9284	24.0315	24.3155	0.684739
YWHAQ	26.1612	22.6381	24.8784	25.6468	22.0966	24.2842	1.62653
RBP4	19.2859	21.3676	26.0463	28.7016	25.8633	24.253	3.42335
DJ-1;PARK7	23.9447	23.1132	25.5617	26.5904	21.942	24.2304	1.66783
NEO1	22.5999	19.5864	24.551	29.0012	25.2116	24.19	3.09977
PDXK	25.0777	22.0361	25.2899	26.3033	22.2227	24.186	1.7305
ALB	22.864	21.7611	25.6727	26.4289	24.1938	24.1841	1.72447
GLO1	24.5997	22.1389	24.5515	26.0247	23.4338	24.1497	1.29888
CPS1	24.7522	24.7998	24.0678	22.6035	24.4044	24.1255	0.805618
ATP5A1Z;ATP5A1W	26.6783	24.1117	23.3521	24.6267	21.8386	24.1215	1.5872
HSPA5	23.9761	22.1211	23.8124	26.806	23.8131	24.1058	1.51119
IDH1	24.2108	22.232	24.1861	26.7412	23.0866	24.0914	1.51735
CADM1	23.1399	21.6847	24.3574	26.5701	24.5772	24.0658	1.62142
AHSG	22.3187	21.0729	26.0072	26.5322	24.3669	24.0596	2.09536
CPE	22.8321	20.694	25.1909	27.0517	24.3875	24.0312	2.15267
GLUL	25.5461	23.1532	25.1631	25.9545	19.9894	23.9613	2.20717
HBBR;HBE	18.2331	22.934	20.5084	29.8087	28.2001	23.9369	4.42598
PTPRS	22.1778	18.5831	25.074	28.7307	25.0419	23.9215	3.38381
LMAN2;LMAN2L	21.7554	20.7992	24.793	27.4959	24.5456	23.8778	2.38144
TUBB4B	26.3389	22.7395	24.1793	25.8925	20.0061	23.8313	2.30139
HSPA4L	26.0367	22.7187	24.4452	23.6865	22.1281	23.803	1.37086
CLEC3B	22.8054	20.191	22.2122	29.5532	24.1426	23.7809	3.15435
CA2	22.1733	19.4545	24.3156	26.8534	26.0941	23.7782	2.69736
PGM1	25.3075	22.6957	24.9089	24.1453	21.801	23.7717	1.32916
VNN3;VNN2	23.5862	22.6047	25.0594	24.3379	23.2314	23.7639	0.856358
TUBA1A;TUBA4B;TUBA3E;TUBA1C	25.8249	21.7223	23.8739	25.9593	21.3218	23.7404	1.96004
NLGN4X;NLGN4	22.7555	20.2235	24.2554	26.7192	24.7155	23.7338	2.16461
SOD2	22.9822	19.1663	25.0173	27.4642	23.9769	23.7214	2.72208
SEZ6L	22.834	21.3731	24.1899	26.4117	23.6229	23.6863	1.65907
DKK3	22.0645	19.2159	25.1459	27.4309	24.5698	23.6854	2.81239
A2ML1	22.5018	22.3011	25.0748	24.851	23.6431	23.6744	1.14956
SST	23.032	22.0577	23.1194	26.0199	24.0932	23.6644	1.34243
ALCAM	22.8402	20.4989	23.9166	26.4989	24.4922	23.6494	1.97391
ENPP6	22.4209	20.6376	24.8676	25.8371	24.4167	23.636	1.86751
PRDX6	23.7911	22.6352	24.3826	25.6367	21.728	23.6347	1.35842
NRXN1	21.6889	18.0703	24.481	28.7454	25.0531	23.6077	3.56628
PRDX1	22.0298	21.5174	22.4109	28.746	23.2312	23.5871	2.63942
HSPD1	24.7437	23.2883	23.2513	25.5206	20.7879	23.5184	1.61805
PKM 1	24.2539	22.3189	23.8327	25.1441	21.8974	23.4894	1.21201
SEZ6	22.3721	19.0817	24.3696	27.3556	24.0585	23.4475	2.70973
PLXDC2	22.1861	19.9349	24.3764	26.7268	23.8375	23.4123	2.2668
FABP7	23.4321	21.3605	24.3569	25.443	22.4243	23.4034	1.42844
CALR3	23.4067	21.7424	23.4126	25.1773	23.2496	23.3977	1.08894
NRXN3	21.7858	17.9245	24.5572	28.3669	24.3519	23.3973	3.4497
FETUB	22.6712	21.2706	24.2575	25.8624	22.7955	23.3715	1.56368
SERPINI1	22.6182	20.821	23.8425	25.7594	23.643	23.3368	1.61644
AKR1E2;AKR1B1L	22.5251	19.4244	25.0353	26.5261	22.9506	23.2923	2.41503
H2A-IX;H2A-VII;HIST1H2A4L2;HIST1H2A3;HISTH2A4L1;HIST1H2A4L4;HIST1H2A4L1;HIST1H2A4;HIST1H2A4L3	24.0986	22.78	22.1888	24.1148	23.0636	23.2492	0.754958
H2B-I;H2B-II;H2B-III;H2B-IV;H2B-VI;H2B-V;H2B-VIII	24.1456	23.0637	22.522	23.417	22.9627	23.2222	0.542851
LOC776594	21.1936	19.9967	24.4783	25.9158	24.5175	23.2204	2.2374
PEBP1	20.3874	18.7208	25.0767	27.9252	23.9776	23.2176	3.29928
AFABP	22.0654	19.3846	23.6996	26.2697	24.6224	23.2083	2.34691
MYH1F;MYH1C;MYH1B;MYH1A;MYH1D;MYH1E	23.6957	23.674	22.9539	21.6005	23.7389	23.1326	0.819387
HEXB	19.059	20.7529	25.3446	25.9885	24.2781	23.0846	2.70579
FUCA1	21.7175	19.863	25.1147	26.2922	22.3605	23.0696	2.33156
A2ML1	21.2248	21.3691	24.1469	24.8281	23.7563	23.0651	1.48456
DPYSL2	25.046	20.0985	23.1694	27.7452	19.1996	23.0518	3.14895
EXTL2	20.9714	18.8936	23.8631	26.7852	24.5299	23.0086	2.77093
CNDP2	23.64	21.4132	23.0025	24.9642	21.867	22.9774	1.27017
NPC2	21.6508	18.0069	24.6565	26.5184	23.7997	22.9265	2.91504
PSMA7	24.2171	21.236	22.2383	24.7565	22.0356	22.8967	1.35168
PPIA	22.3242	16.8096	25.5141	27.1279	22.6495	22.8851	3.52688
DPP6	22.0274	20.9434	23.2687	24.8576	23.1895	22.8573	1.31397
CTSH	21.2442	18.4293	24.1853	25.8065	24.4843	22.8299	2.65758
GAAGSD	21.095	20.7969	23.2457	26.0679	22.9437	22.8298	1.88752
LRP1	21.2731	20.3927	23.674	25.5232	23.1207	22.7967	1.81157
GSTA1;GSTA2;GSTA3;GSTA4;GSTA5	22.5035	17.4122	24.8036	25.7842	23.1858	22.7379	2.90398
BASP1	23.9341	21.0327	21.3201	24.7663	22.4792	22.7065	1.45088
CADM2	21.5341	18.623	23.6523	26.4595	23.1962	22.693	2.57943
HRG	20.1474	19.3763	25.4567	23.5047	24.7929	22.6556	2.45681
EFCAB14	23.5024	21.5716	20.6364	26.0769	21.4	22.6375	1.96212
GLUD1	24.5815	22.2439	21.7723	22.1505	22.2074	22.5911	1.00937
CLSTN1	22.1974	17.8742	23.7558	25.3363	23.6373	22.5602	2.54506
ATP1A1	23.6001	21.6096	21.8605	24.2889	21.3161	22.535	1.18388
BLMH	22.8202	20.7696	21.688	24.8229	22.5417	22.5285	1.35276
EEF1A1	22.7217	22.4343	22.4926	22.7352	22.2219	22.5211	0.191799
BCAT1	21.7022	19.7957	23.1652	24.9117	23.0006	22.5151	1.70048
SKP1	24.732	21.2286	22.9395	24.258	19.4152	22.5146	1.96959
AHCY	24.0631	22.1312	22.3004	22.6435	21.3572	22.4991	0.888322
POMGNT1	20.8591	16.3344	23.2466	27.6294	24.3528	22.4845	3.76847
GDA	22.2261	19.5402	22.9222	24.7431	22.9212	22.4706	1.68631
C4orf48	20.1074	20.4208	22.8086	25.8114	23.1714	22.4639	2.07619
AMBP	20.3322	21.2699	22.7686	24.8731	22.6663	22.382	1.54105
DDAH1	24.3958	20.2037	22.0975	23.4706	21.1738	22.2683	1.51403
BHMT	22.1452	21.9405	21.8351	23.5827	21.7731	22.2553	0.675614
CTSA	20.6601	18.7882	23.7602	24.9151	23.1282	22.2504	2.22111
ASS1	23.01	22.8061	22.6288	20.6392	21.8173	22.1803	0.870392
CDH4	19.9936	17.6693	22.4934	26.6087	24.1197	22.1769	3.11772
RTN4RL1	20.7451	18.2317	23.058	25.7769	23.0344	22.1692	2.53322
MTAP	22.0221	18.872	23.0614	24.9037	21.9668	22.1652	1.95998
PSMA2	23.4532	20.7732	21.3491	23.2856	21.7215	22.1165	1.06799
CAMK2G	21.158	19.3933	22.6423	24.7448	22.4717	22.082	1.76858
KAZALD1	18.3978	20.2164	23.11	25.3458	23.3261	22.0792	2.46214
DSP	21.2145	20.7599	21.4635	23.0901	23.8584	22.0773	1.18784
PGD	22.9651	19.0731	22.6781	24.8478	20.809	22.0746	1.97275
ACAT1	24.6407	20.1946	20.916	23.8497	20.281	21.9764	1.88579
NID1	19.8786	18.9158	22.5214	25.666	22.8421	21.9648	2.38439
ALDH2	24.854	20.5183	21.3956	22.3897	20.5646	21.9444	1.60641
GLB1	18.5146	18.8713	23.4308	25.7298	22.8548	21.8803	2.77687
FRRS1L	20.5412	18.9692	22.7526	24.8403	22.1238	21.8454	1.99217
ME1	22.542	20.509	22.1843	24.1409	19.4739	21.77	1.62796
UCHL3	22.6872	20.2042	21.5131	24.0402	20.3908	21.7671	1.44325
FGA	20.3562	19.9357	21.9054	26.0636	20.5349	21.7592	2.25131
CD109	21.0646	16.5188	23.4854	24.8994	22.6753	21.7287	2.88513
SELENOP	19.0579	19.7945	22.4228	25.587	21.6788	21.7082	2.29099
FSTL1	20.1673	19.1138	21.8888	24.7119	22.5829	21.6929	1.94546
PCSK2	20.1283	19.7373	21.7812	25.1514	21.6269	21.685	1.91025
TFRC	19.829	20.2386	21.1303	24.5645	22.3473	21.622	1.70613
OMG	19.8113	18.0413	23.2281	24.9722	21.8363	21.5779	2.44703
PSMB1	22.9151	20.0551	20.9087	22.6809	20.5013	21.4122	1.16564
SH3BGRL	21.273	19.0449	22.4547	23.2917	20.7059	21.354	1.46455
PSMA3	22.4107	20.0227	21.454	22.0806	20.7913	21.3519	0.865298
MPST	23.5106	18.3789	21.8102	22.9109	19.534	21.2289	1.96819
ACO2	19.7256	19.0651	21.2209	26.0534	19.8327	21.1796	2.53595
MCFD2	17.9345	18.7138	22.7805	23.1016	23.0419	21.1145	2.2941
RAB1A	21.0307	19.3491	21.0666	23.0467	20.753	21.0492	1.18056
AKR1E2;AKR1B1L	20.0782	17.8136	23.3181	23.8127	20.0423	21.013	2.24518
HEPH	19.1387	17.1205	21.5818	24.7803	22.1578	20.9558	2.62582
XPNPEP2	18.4035	19.0732	20.5172	26.4454	20.0336	20.8946	2.8712
CDH7	19.436	16.2231	21.2976	25.1047	22.3839	20.8891	2.96836
PSMB2	21.4288	19.3213	20.8173	21.7443	19.6168	20.5857	0.96377
TALDO1	20.369	17.4698	21.4404	23.3897	20.1521	20.5642	1.92533
PSMA6	21.6703	18.5133	20.6277	22.5675	19.2697	20.5297	1.4911
FGFR1	18.7301	17.633	21.6804	23.6798	20.8472	20.5141	2.14367
PSMA4	21.8722	18.8294	20.909	21.2446	19.3517	20.4414	1.15735
FGB	16.9347	18.7142	20.443	24.7099	20.8625	20.3329	2.59301
C1QC	20.4059	20.3938	19.7276	20.6197	20.0748	20.2444	0.311472
CALU	22.0553	18.1873	20.0449	21.773	19.0181	20.2157	1.50914
PEPD	18.7586	18.0403	21.6151	21.9152	20.0205	20.07	1.5254
P4HB	21.6325	20.4901	18.8012	18.5214	20.2561	19.9403	1.14683
SCPEP1	18.0977	17.8607	21.5834	21.5649	20.2397	19.8693	1.62009
PTMA	20.5977	20.0151	20.1945	18.3106	18.4233	19.5082	0.951447
COL15A1	18.4319	17.0746	18.809	23.4924	18.1722	19.196	2.22446
EEF2	17.6215	17.3109	17.6323	21.462	17.7223	18.3498	1.56232

## Sheet: PL GG x GG
Supplementary Table S2. Core proteomes of CSF and PL
Gene.names	GG8-PL	GG9-PL	GG10-PL	GG11-PL	GG12-PL	GG13-PL	GG14-PL	AVERAGE	GG_PL_STDEV
ALB	37.6682	37.5799	37.9059	37.7819	37.9566	38.1634	37.5849	37.8059	0.216015
APOA1	37.0699	36.7664	35.7753	36.2802	36.3358	36.2703	36.9454	36.4919	0.455859
TRFE	35.0566	34.4916	35.6404	35.8522	35.953	35.9599	34.3742	35.3326	0.688605
A2ML4	36.4369	34.5261	35.6293	35.0779	35.1272	35.4901	34.3184	35.2294	0.71228
C3	35.3697	34.6573	34.9374	34.8773	34.8488	34.8271	34.4898	34.8582	0.272456
LOC107051274	34.1513	34.1001	34.2785	34.243	34.3464	33.9108	33.9384	34.1384	0.166968
APOB	34.7959	31.0801	35.8875	35.5874	34.9079	35.1865	31.1654	34.0872	2.05975
TTR	33.8441	34.0314	33.1965	33.0697	33.357	33.5005	33.8721	33.5531	0.369083
FCGBPL	34.9101	32.0931	34.0851	33.5443	33.6953	32.5258	32.3906	33.3206	1.0251
C4A	34.0728	32.8321	33.1368	33.0025	33.5168	32.9815	32.7028	33.1779	0.471182
A2M	33.4251	33.017	33.3951	32.5754	32.483	32.8212	33.0167	32.9619	0.36669
P20763	33.0807	33.0549	33.1271	32.8812	32.935	32.4775	32.7577	32.902	0.226756
IGHM	32.6259	33.0916	32.4203	33.3159	32.9499	32.4407	32.3681	32.7446	0.374688
GC	32.4386	32.3337	32.9212	32.8849	33.152	33.1047	32.338	32.739	0.359175
APOA4	32.9707	32.8236	32.0167	31.9947	31.9566	32.4271	32.7468	32.4195	0.434228
TF	31.6982	32.0438	32.319	32.3751	32.536	32.5419	31.7459	32.18	0.354538
TECTA	33.4959	30.9845	32.622	32.079	32.0578	31.2977	31.2393	31.968	0.887902
A2M	32.1805	31.9911	31.9752	31.6452	31.6793	32.2374	31.9193	31.9469	0.225498
OGCHI	32.3204	31.4639	32.0179	31.4561	32.0927	31.9412	31.7046	31.8567	0.327057
ITIH2	32.1376	31.7159	32.0635	31.7548	31.8013	32.1057	31.4177	31.8566	0.261309
VTN	31.9466	32.4	31.4628	31.5276	31.427	31.7011	31.8297	31.7564	0.343011
HBB	30.7812	32.2224	31.4016	30.9001	31.7298	30.2939	34.1857	31.6449	1.28979
A0A3Q3AIA0	31.5964	30.9852	31.5971	31.7056	31.5314	31.4323	30.9188	31.3952	0.31428
HRG	32.5422	31.7252	31.2921	30.8856	30.5238	31.3661	31.074	31.3441	0.650629
AGT	31.0459	30.7046	31.8741	31.4878	31.6417	31.8408	30.5299	31.3036	0.545613
SERPINC1	31.708	31.4483	31.3009	30.9278	31.196	31.6241	30.4792	31.2406	0.426597
VTG2	24.6566	23.864	36.7191	36.4695	36.0324	36.3034	24.5	31.2207	6.44392
C5	31.8505	31.1154	31.1075	30.7653	31.0721	31.1826	30.8567	31.1357	0.349619
F1NA58	31.1507	30.7597	31.3377	31.287	31.3972	31.6199	30.2904	31.1204	0.451119
PLG	31.56	30.9863	31.0753	30.7861	30.6372	30.9613	30.9159	30.9889	0.289982
HBAA	30.018	31.1517	30.5544	30.388	30.7556	29.5491	33.6679	30.8692	1.33687
GPX3	31.5354	30.6528	31.152	29.8674	30.4732	30.9006	30.9795	30.7944	0.533087
FN1	30.817	31.1588	30.2762	30.591	30.4108	30.6271	31.0501	30.7044	0.3233
A0A3Q2TWQ7	32.79	29.4306	31.6391	31.1731	30.3476	29.4225	29.875	30.6683	1.25931
APOC3	32.4524	28.8479	30.7571	30.0637	29.9325	30.8185	31.3673	30.6056	1.14712
A2ML1	30.4696	30.4086	30.2579	30.784	30.2862	30.5961	30.3218	30.4463	0.189296
A2M	30.7294	30.3333	30.441	30.5163	30.3313	30.6208	30.1219	30.442	0.202728
GSN	29.6339	31.1205	29.9596	30.4541	29.9781	30.3121	30.9567	30.345	0.544265
F1NEQ4	30.3094	30.1947	29.9869	30.7978	30.3728	30.6482	30.0141	30.332	0.304994
HBAD	29.6225	31.2671	29.9108	29.2498	30.0284	29.1494	33.024	30.3217	1.38222
C4	31.2505	30.723	29.6526	30.3922	30.0122	29.6718	30.3703	30.2961	0.57622
SERPIND1	30.521	30.0499	30.1704	30.21	30.2523	30.3834	30.1411	30.2468	0.158638
A0A3Q2U8K0	30.1949	30.2561	30.0806	30.628	29.9612	30.3652	30.0761	30.2232	0.222286
ODF2	30.2151	29.8863	30.5227	30.2497	29.9264	30.725	29.9067	30.2046	0.327021
A2M	30.3638	29.9456	30.2581	30.2651	29.9944	30.3225	29.9294	30.1541	0.189279
ITIH3	29.4114	30.3357	30.1172	30.3371	30.2733	30.0165	30.3727	30.1234	0.340057
A0A3Q3AGK3	30.3274	29.7845	30.6436	30.3364	30.4902	29.9218	29.2576	30.1088	0.482327
VTG1	26.6173	23.5055	34.1191	34.5002	34.0062	33.4769	23.1507	29.9108	5.2573
KNG1	30.0165	29.8225	29.5912	29.7308	29.845	29.9949	29.9846	29.8551	0.157398
SERPINF2	30.1694	29.6111	29.7373	29.8342	29.9	29.9959	29.7104	29.8512	0.189432
SPIA1	29.0855	31.0507	29.4491	29.4124	29.1761	29.6577	31.0296	29.8373	0.842602
SPIA3	28.4367	30.3328	30.1861	29.8134	29.7808	29.6417	30.3633	29.7935	0.662585
CP	30.0777	28.6931	29.9938	29.3455	29.8426	29.6858	28.6472	29.4694	0.595121
F10	30.1536	29.5146	29.04	29.1106	29.1535	29.4514	29.2435	29.381	0.382918
F2	29.7551	29.5297	29.4695	29.0236	28.8541	29.452	29.3889	29.3533	0.309558
A0A3Q2U9M3	30.5499	30.3481	28.9229	28.6311	28.8387	28.1082	29.9691	29.3383	0.941724
CFD	29.5471	29.105	29.073	28.8049	29.171	29.0248	28.8653	29.0844	0.242156
C8B	29.8078	28.8409	28.9859	28.9586	29.1211	28.957	28.5145	29.0265	0.393086
ACTG1;ACTB	29.0823	29.1768	28.8798	29.5138	29.1683	27.6467	29.3652	28.9761	0.619906
APOH	29.1044	29.1773	28.9454	28.9372	28.8435	29.0657	28.2062	28.8971	0.325053
IGFALS	29.0082	29.2218	28.8411	28.8077	28.4054	28.5111	29.4182	28.8877	0.362991
LOC419851	30.0555	28.8699	28.9836	28.4582	28.4427	28.9304	28.3613	28.8717	0.582074
ALB	28.6616	28.7167	29.1365	28.6565	28.8795	29.1178	28.7059	28.8392	0.210292
VNN1	28.5358	28.2278	29.7754	28.6937	29.438	29.0707	27.8943	28.8051	0.665887
C7	28.7316	29.8523	27.7246	28.2691	28.4079	28.1824	29.6882	28.6937	0.795349
LOC776376	29.4733	29.0019	28.3653	28.3562	28.0921	28.1864	28.6588	28.5906	0.495084
C8A	29.2137	28.88	28.2149	28.2915	28.3771	28.2351	28.4668	28.5256	0.378647
SPIA4	28.13	29.2903	27.5741	28.6774	28.4415	28.4349	28.972	28.5029	0.559844
A0A3Q2TYZ3;A0A3Q2UFX8	29.0167	28.498	28.1903	28.4902	28.8574	28.0307	28.3302	28.4877	0.35088
A0A3Q2U7L8	28.5772	27.65	28.5647	29.3478	29.0667	28.5394	27.5597	28.4722	0.664945
A0A3Q2U1A2	28.5511	29.2806	27.8108	27.9159	28.0338	28.1382	28.9738	28.3863	0.564273
CFBL	28.7126	28.1288	28.1592	28.4907	28.4628	28.6556	27.8147	28.3463	0.323846
SOD3	27.9678	29.9494	27.5093	27.7388	27.5442	27.3504	29.6972	28.251	1.09389
BIRC6	29.2086	27.9056	28.2456	28.6204	27.3407	27.9664	28.4202	28.2439	0.593126
TFR2	27.5883	27.0527	28.658	29.6089	28.9785	28.3899	27.4131	28.2413	0.925074
RBP4	29.1315	27.7447	27.5092	28.4432	27.2884	28.6383	28.697	28.2075	0.692947
LOC423629	27.847	29.3906	27.9906	28.188	26.4233	28.1701	29.4115	28.203	1.01747
NGCA	28.0966	28.6685	28.0273	28.1621	27.659	28.0176	28.7082	28.1913	0.375298
A0A3Q2U5V5	27.7347	27.3521	28.4443	27.6335	28.3497	28.2338	29.4076	28.1651	0.681825
C8G	28.7605	27.9822	27.8952	28.1894	28.2428	27.6564	28.0596	28.1123	0.345868
TTR	28.9557	22.5143	30.2542	30.6056	30.7212	30.6952	22.9921	28.1055	3.70917
ANPEP	29.2686	27.8767	27.7298	27.8337	28.0195	27.8241	28.1436	28.0994	0.533532
PIT54	27.4302	27.9573	28.3173	28.2845	28.5436	28.1942	27.7498	28.0681	0.381092
A0A3Q2UFU8	28.7407	26.1759	29.4744	28.393	29.3791	28.4417	25.7717	28.0538	1.48586
PTGDS	30.2896	26.8084	27.5181	28.0409	27.8268	28.7759	26.4079	27.9525	1.29403
A0A3Q2UDC8	27.2303	27.0313	28.8689	28.5293	28.1964	27.3902	27.5332	27.8257	0.704917
CKM	28.1897	26.0889	26.9221	28.2416	28.1304	28.6749	28.2818	27.7899	0.926588
C6	27.6529	28.5738	27.6329	27.386	27.2286	27.3493	28.3445	27.7383	0.519493
CPN2	28.1841	27.6731	27.624	28.0621	27.6518	27.2875	27.6619	27.7349	0.299259
HGFAC	27.5691	27.188	27.8902	27.9354	27.5753	28.1041	27.2283	27.6415	0.353144
A0A3Q2U8E0	28.081	28.5693	27.0517	27.9021	28.1045	26.0355	27.7054	27.6356	0.84332
AHSG	27.3005	27.7894	27.2127	28.2095	27.0735	27.9764	27.8669	27.6327	0.433918
LOC101750889	27.6952	28.8049	26.328	27.3178	27.1899	27.1394	28.646	27.5887	0.878647
A0A3Q2UFX3	26.0212	29.8924	26.6607	26.9921	27.9814	26.1598	29.0892	27.5424	1.49519
A0A3Q3ASJ5	26.67	25.7449	27.5102	28.3143	28.4642	28.0718	27.223	27.4283	0.977219
A0A3Q2TV88	27.0804	26.847	27.8259	28.0928	27.154	26.9429	27.4859	27.347	0.470208
LUM	26.4677	28.6706	26.319	27.3009	26.2242	27.7108	28.6567	27.3357	1.05604
CHIA-M31	24.6149	28.5367	27.3194	27.8944	27.0502	27.4784	28.3954	27.3271	1.31542
JCHAIN	28.6827	28.3063	26.2451	26.3117	26.268	27.2921	28.1151	27.3173	1.05997
F9	27.5689	26.5707	27.6392	27.2686	27.46	27.6642	26.5678	27.2485	0.482348
C1S	27.9723	27.5	26.8435	26.9739	27.1039	27.1208	26.6675	27.1689	0.439125
S100B	27.2235	27.2668	27.5695	26.4305	26.7748	27.4723	26.9634	27.1001	0.403077
AMBP	27.0478	26.97	26.8962	26.9569	27.1869	27.2592	26.9561	27.039	0.134922
PGLYRP2	26.1508	27.2942	27.016	26.6627	27.3527	26.9768	27.3698	26.9747	0.443289
VNN1	26.7264	26.2202	27.4483	26.8016	27.206	27.6966	26.2369	26.9052	0.573042
CST3	26.4841	27.4658	26.311	26.3476	26.7038	27.2398	27.3299	26.8403	0.493114
CFI	27.2576	26.9498	26.4452	26.8504	26.6406	26.7563	26.8022	26.8146	0.253668
IL1RAP	26.3162	26.6872	26.2788	26.5845	26.9362	26.5504	26.7677	26.5887	0.236049
A0A3Q2U775	26.2231	25.3057	27.985	27.7483	25.9208	28.6103	24.1612	26.5649	1.60706
ENPP2	27.8409	27.1521	26.1927	26.0243	25.6314	26.466	26.6009	26.5583	0.740051
FETUB	27.3407	27.3133	25.7283	26.7794	25.3945	26.1742	27.1435	26.5534	0.792065
A0A3Q2TUE5	25.793	26.3873	25.7851	28.2154	25.9748	26.1614	26.9338	26.4644	0.869495
LCAT	29.4889	26.967	26.7572	23.6781	24.4738	26.4866	27.3827	26.462	1.91728
GPLD1	27.3815	26.8443	25.5218	26.1591	26.0566	25.522	27.5999	26.4407	0.847247
VCAM1	26.2053	26.2616	26.5283	26.8114	26.6068	26.6721	25.9708	26.4366	0.29844
COMP	22.1746	22.9281	29.2137	28.6891	29.2984	29.31	23.2005	26.4021	3.4198
CPB2	27.0057	26.264	25.9511	26.231	26.6097	26.3429	25.9355	26.3343	0.375991
SERPINF1	25.5427	26.796	26.2522	25.3788	25.8213	25.9127	26.7683	26.0674	0.561284
A0A3Q2UDA5	26.7596	27.0764	26.5121	26.3349	25.1373	23.8324	26.1284	25.9687	1.1227
IL6ST	23.7496	28.3546	24.5492	26.1414	25.5872	25.1638	28.0839	25.9471	1.72848
LOC101748084	26.31	25.8116	25.7039	25.7478	25.5797	25.8904	25.9922	25.8622	0.237622
CLEC3B	26.2037	27.0198	25.8122	25.7896	24.5115	25.0136	26.6098	25.8515	0.872453
C1QA	26.1421	25.979	25.7521	25.5409	26.0706	25.5972	25.6103	25.8132	0.247548
PROS1	25.5238	26.282	26.4414	26.4407	24.9722	25.4004	25.2333	25.7563	0.616886
FGA	25.8983	26.5996	25.0147	25.5621	25.7755	25.4977	25.7022	25.7215	0.479682
ATRN	25.6137	26.2598	25.3185	25.215	25.4974	25.2538	26.2803	25.6341	0.456082
A0A3Q2U0T0	25.603	26.7264	25.1782	25.5712	24.3577	25.18	26.6182	25.6049	0.837029
FN1	25.6956	25.6938	25.1596	25.3245	25.3951	25.923	25.8836	25.5822	0.292204
A0A3Q2U0N4;A0A3Q2U4V6	26.353	23.7425	25.7772	26.2776	26.749	25.7439	23.0033	25.3781	1.42868
HABP2	26.1407	26.0953	25.3631	24.9927	23.968	25.3543	25.6957	25.3728	0.745442
C1R	25.9242	25.4444	26.4222	24.8317	24.5454	25.2433	25.029	25.3486	0.647912
BST1	26.5109	24.3155	25.621	24.6877	25.8704	25.5547	24.6595	25.3171	0.786537
A0A3Q2UHW8	26.1727	24.9576	25.3102	26.1257	25.0002	25.4378	24.0155	25.2885	0.743705
MB	25.4252	22.1729	23.7068	25.886	25.769	25.3184	26.9251	25.029	1.58238
PLGL	25.3767	25.5877	25.0055	24.7964	24.5044	24.7541	25.1162	25.0201	0.375393
CSF1R	25.5656	24.9686	24.9133	25.0893	25.4347	24.5816	24.4925	25.0065	0.399512
MBL	25.2207	23.7977	25.5121	25.3076	25.3497	25.7456	23.945	24.9826	0.77892
NELL2	25.5072	24.8594	25.2857	24.8804	23.5804	25.3869	25.1907	24.9558	0.653268
PHLDB2	22.8965	26.0955	23.2275	24.2763	26.3626	26.5299	24.7771	24.8808	1.49654
RCJMB04	23.7868	25.5963	24.6499	24.6753	24.6599	25.077	25.2848	24.8186	0.581333
F10	25.4186	24.4094	25.3968	24.6431	24.3246	24.9272	22.4018	24.5031	1.02407
DOCK9	24.391	24.2898	24.4457	25.102	24.4417	24.9969	23.6415	24.4727	0.483663
ADIPOQ	24.0444	25.1349	23.8362	24.5383	24.1478	24.4357	25.0418	24.4542	0.493255
SERPINA10	23.7683	23.8348	24.939	24.8821	24.359	24.6736	23.4864	24.2776	0.584204
LOC776594	23.9695	24.9759	24.6518	23.5669	23.9679	24.1668	24.5735	24.2675	0.486935
NCAM1	22.8696	25.8534	23.1986	23.244	23.58	25.3818	24.1577	24.0407	1.15654
PROC	24.4421	23.6136	23.8374	23.0228	24.1864	23.9608	24.1121	23.8822	0.461495
FBLN1	24.5047	24.0569	22.4741	23.8137	23.2191	24.2895	24.8028	23.8801	0.80192
B2M	23.6204	24.0887	24.0067	24.3616	23.3216	23.2453	23.8213	23.7808	0.409919
TPI1	22.9514	22.427	21.9523	23.8578	23.9772	24.6103	26.263	23.7199	1.45673
MST1	24.3126	23.3807	24.211	22.8236	23.0541	23.3496	23.8153	23.5638	0.567129
F5	22.4748	23.2791	24.1205	24.1785	22.6575	25.0091	23.1766	23.5566	0.914208
GPI	24.6314	23.0413	23.5967	20.4458	24.3094	24.6513	23.8597	23.5051	1.46843
ITIH3	21.9178	24.5079	22.4422	23.137	24.3304	23.7951	24.0696	23.4571	0.988102
COL11A2	23.7386	23.4503	23.5389	23.6609	23.916	22.1564	23.2666	23.3897	0.582286
LCP1	24.5888	24.6146	23.5745	22.2855	22.7108	21.4964	23.432	23.2432	1.16107
ENO3	24.2363	19.1446	22.2984	24.4665	23.2547	24.6932	24.5864	23.24	2.00335
GOT1	24.1048	23.0083	22.452	22.6752	22.1229	22.4164	24.6169	23.0566	0.942366
ACTA1	22.1714	21.1251	21.1625	25.1139	22.1806	24.0955	25.4859	23.0479	1.82948
EXFABP	23.361	22.3673	22.2723	23.0418	24.0053	22.5928	22.8981	22.9341	0.608048
CA2	18.9261	24.2531	22.9114	22.0596	22.7033	21.5915	27.5789	22.8606	2.64454
VEGFRKDRL	25.2685	22.9194	23.7639	19.4694	20.2182	24.5772	23.7975	22.8591	2.19561
LDHB	23.8593	21.8721	20.7509	22.8511	22.701	22.9746	23.3827	22.6274	1.02922
GAPDH	22.8291	20.9134	22.1042	22.8624	22.7995	22.8652	23.6741	22.5783	0.863369
BLB1	22.2055	22.8477	22.7377	22.1126	21.4423	22.6145	22.2667	22.3181	0.477665
PLXNB2	22.5688	19.8807	22.0235	23.682	23.7904	21.3004	22.0575	22.1862	1.36015
TMSB4X	22.4993	22.5154	22.0259	22.4376	20.0296	22.3314	23.2683	22.1582	1.011
HEG1	21.1429	22.815	22.1484	22.0063	22.2107	20.871	23.2392	22.0619	0.84149
AMH	20.6586	22.5879	22.1401	21.9638	21.5995	19.2471	22.7564	21.5648	1.23498
A0A3Q2TX54;A0A3Q2U8X8	20.2844	20.29	23.6273	19.1847	22.3175	21.504	22.693	21.4144	1.57418
SPIA9	22.2992	22.309	19.5062	19.9779	19.1703	22.1739	21.9475	21.0549	1.43063
CTSB	19.5942	20.1469	18.4728	21.8835	21.9651	21.0416	20.481	20.5121	1.25218
HSPA8	18.1762	16.8504	21.196	19.3589	18.3784	20.8349	21.5849	19.4828	1.78202

## Sheet: PL MU x MU
Supplementary Table S2. Core proteomes of CSF and PL
Gene.names	MU6-PL	MU7-PL	MU8-PL	MU9-PL	MU10-PL	PL_MU_AVERAGE	MU_PL_STDEV
APOA1	39.3812	38.6622	38.5874	38.682	38.1117	38.6849	0.453712
HBAA	38.1358	37.7615	38.1117	38.0572	38.4519	38.1036	0.245763
HBB	37.6853	37.4596	37.6853	37.4672	37.1735	37.4942	0.210828
ALB	36.6522	35.1391	36.2835	36.13	36.0363	36.0482	0.559798
A2M	34.2066	36.6253	33.4134	33.7813	33.3718	34.2797	1.35373
TF	34.5768	35.3651	33.5609	34.1776	33.5241	34.2409	0.767594
TTR	34.7262	33.0052	33.8554	33.5448	33.4168	33.7097	0.644967
ITIH3	34.2331	34.3482	31.9894	32.8488	31.9231	33.0685	1.17457
APOB	33.6332	34.4473	32.9895	32.9467	31.1581	33.035	1.21296
VTN	34.2459	33.6005	32.3499	31.6047	32.1161	32.7834	1.09876
APOA4	33.6884	31.6989	32.6658	32.3168	31.5303	32.3801	0.863642
IGLL1	31.2212	33.3676	32.1728	32.9471	28.8958	31.7209	1.77837
ITIH2	32.8012	32.0977	31.384	31.2361	30.6215	31.6281	0.840118
C4A	33.2011	32.7303	31.7271	30.233	30.1476	31.6078	1.39957
CA2	31.3089	31.1479	31.5741	30.9376	32.343	31.4623	0.544473
SERPINF2	32.2023	31.6619	30.9259	30.9447	30.8506	31.3171	0.594108
A2ML1	32.1658	31.638	31.2953	30.1588	29.9535	31.0423	0.954871
A2ML1	32.2387	30.4802	31.1996	30.146	30.9354	31	0.802787
PRDX1	31.1586	30.2112	31.5423	31.0876	30.8266	30.9653	0.493245
AHSG	30.4881	31.7769	29.684	31.1648	31.5805	30.9388	0.857743
FN1	31.4759	31.9436	30.9236	30.2847	29.2125	30.7681	1.06779
MCFD2	32.2543	30.4618	30.463	30.6127	29.7553	30.7094	0.925795
MINPP1	32.3671	30.9096	30.693	30.2632	29.2836	30.7033	1.12028
HRG	30.1647	30.0185	31.6241	31.5723	29.5703	30.59	0.946226
TTR	32.153	30.9898	29.8885	31.4713	27.9797	30.4965	1.63107
HSPA8	29.9948	30.6874	30.2044	30.1542	31.2352	30.4552	0.506871
GC	31.3848	31.6968	29.9936	28.7368	30.0368	30.3698	1.19481
C3	31.4749	31.6803	30.8295	28.7523	29.0854	30.3645	1.3616
OGCHI	27.4791	33.519	29.4269	30.5392	30.8148	30.3558	2.20162
C5	31.7564	32.07	29.8793	29.9873	27.6427	30.2671	1.77373
SERPINC1	30.9791	30.8483	29.8727	29.7421	29.7932	30.2471	0.612072
SERPIND1	31.7546	30.6359	29.9328	29.3003	29.0079	30.1263	1.1047
KNG1	31.0492	30.1027	29.8381	30.1738	29.3071	30.0942	0.633165
HSP90AA1	29.165	30.9287	29.3137	29.831	30.0077	29.8492	0.697453
SPIA3	31.0055	30.0539	30.0887	28.8989	28.8155	29.7725	0.919023
CP	30.8105	31.3262	28.5684	30.867	26.914	29.6972	1.88956
HP	32.2435	34.875	25.3204	25.4801	29.4456	29.4729	4.18465
PLA2G4C	30.6221	28.5113	29.2074	30.7078	27.9709	29.4039	1.23215
SOD3	29.8727	28.4417	28.8547	29.5858	30.129	29.3768	0.707523
GSN	30.9792	30.6341	28.4731	28.96	27.5553	29.3203	1.45265
AGT	29.7852	29.9188	28.2792	28.6675	29.0357	29.1373	0.706741
TUBB1	29.4013	28.9509	29.7346	29.1572	28.1335	29.0755	0.602083
PLG	30.2172	30.4205	28.7369	28.7915	26.4121	28.9157	1.60263
ITIH4;ITIH3	31.2823	29.4545	27.8959	28.967	26.5628	28.8325	1.7632
APOC3	29.5567	28.8063	28.9239	28.2855	28.0508	28.7246	0.58856
GAPDH	28.273	30.6043	27.2875	27.9725	29.0958	28.6466	1.27232
SLC3A2	29.41	28.6629	29.4211	27.8019	27.5462	28.5684	0.87702
PKM	27.439	29.6313	27.7498	28.6848	29.3148	28.5639	0.954731
CLU	29.9932	29.5615	27.8267	28.7255	26.6235	28.5461	1.3575
LUM	29.1786	29.3952	28.6071	26.7858	28.2915	28.4516	1.02999
ENO1	26.7052	29.6512	25.9402	29.6756	29.3225	28.2589	1.79354
LCN10;LCN8;AL355987.1;LCN6	27.9006	30.0321	27.7327	29.4447	26.1525	28.2525	1.53236
VNN1	27.9802	28.5149	27.4761	29.1571	27.8932	28.2043	0.648376
GPX3	27.3381	28.8117	28.9953	27.4909	28.2778	28.1827	0.751159
BLVRB	28.0687	27.8361	27.5007	27.8434	28.2732	27.9044	0.289148
LRRC15	29.0553	28.4188	27.8886	27.3762	25.9276	27.7333	1.18636
NME1;NME3;NME4;NDK	26.8539	28.2931	27.0568	27.6491	28.4217	27.6549	0.706161
AP2A2	27.7553	26.814	28.2458	28.0019	27.4326	27.6499	0.555886
MDH1	25.0902	30.5091	26.1317	28.6037	27.8391	27.6348	2.11993
TFRC	28.0202	26.9993	26.8376	28.5781	27.3908	27.5652	0.726813
F2	29.5924	28.3247	27.3717	27.8235	24.2745	27.4773	1.97362
HBBR;HBE	25.2702	27.1886	27.769	27.5159	29.0726	27.3633	1.37125
COL3A1	26.1846	26.9048	28.105	28.0774	27.1669	27.2878	0.816947
MB	25.9696	29.9248	24.9836	29.8159	25.7111	27.281	2.39153
PGAM1	25.5956	28.4226	26.6499	28.227	27.4829	27.2756	1.17021
TUBB4B	25.8916	28.531	27.6257	26.9947	27.2965	27.2679	0.960865
TPI1	24.9572	29.15	25.5257	28.0769	28.1639	27.1747	1.82558
LDHA	24.9383	30.6832	25.4608	27.1066	27.1631	27.0704	2.24716
JCHAIN	26.4938	27.8001	27.4537	29.1128	24.4762	27.0673	1.72577
LCAT	27.6835	27.4788	26.9693	25.7764	27.2457	27.0307	0.750043
YWHAE	26.2765	27.7158	26.5894	26.6842	27.7641	27.006	0.686999
HSPH1	29.273	26.8317	27.0713	26.6154	25.151	26.9885	1.48036
APOH	29.7386	28.4872	26.8488	26.5968	23.0689	26.948	2.51681
FABP4	26.1323	28.1603	25.2994	28.1056	26.962	26.9319	1.2442
ADIPOQ	26.3163	27.3843	27.3152	26.4065	27.1306	26.9106	0.510822
TUBA1A;TUBA1C;TUBA3E;TUBA4B;TUBA4A;TUBA8A;TUBA8B;TUBAL3;LOC425049;LOC100857858	26.1567	26.9076	26.7316	26.474	28.2666	26.9073	0.81081
ALAD	27.071	25.3774	26.9516	26.6371	28.2693	26.8613	1.03523
PRDX6	25.6604	28.1668	25.8654	26.8703	27.2763	26.7679	1.03281
PGLYRP2	27.7189	27.5282	27.0683	26.334	25.1813	26.7661	1.03418
PPIA	22.4045	28.0794	27.3203	27.0934	28.6896	26.7174	2.4925
AMBP	28.6269	28.0849	24.9081	27.2318	24.6436	26.6991	1.82714
RPS27A;UBB;UBA52	25.9218	27.1781	26.6491	26.5495	27.0885	26.6774	0.50195
GDI2	25.7548	27.2446	26.1648	26.3369	27.8617	26.6726	0.859358
HBAD	27.4966	24.413	24.3662	26.6959	30.3686	26.6681	2.48822
FTH	26.0461	26.4174	26.4198	26.7853	27.3017	26.5941	0.474129
YWHAZ	26.6547	26.953	26.0908	25.9189	27.3383	26.5912	0.590676
PEBP1	26.2489	26.8696	25.7126	27.0507	26.6558	26.5075	0.535463
GOT1	23.7335	28.9509	25.2694	27.6411	26.1762	26.3542	2.0295
VNN3;VNN2	27.8249	25.1264	27.2718	25.6547	25.8627	26.3481	1.14488
PGK	23.9114	28.843	24.1946	27.1414	27.5103	26.3201	2.16654
AKR1B1	24.6087	26.7603	26.4656	25.9569	27.6094	26.2802	1.11021
LDHB	24.5978	28.6625	23.3621	27.3705	26.8816	26.1749	2.15151
PSMA7	24.8537	26.7469	25.996	26.004	27.0491	26.1299	0.849716
EEF2	26.9477	27.992	25.2209	25.4999	24.8609	26.1043	1.31969
HEPH	27.8986	25.6838	25.7825	26.041	24.9565	26.0725	1.09729
SOD3	27.1744	25.5806	26.5522	25.677	25.3493	26.0667	0.768999
GPLD1	28.6476	26.6112	25.9024	24.274	24.7414	26.0353	1.72842
EEF1A1	26.2035	28.1572	24.6644	26.6411	24.4953	26.0323	1.51231
FASN	23.5973	32.4156	23.7168	25.3834	24.986	26.0198	3.65896
BLVRA	26.213	25.0825	26.345	25.5147	26.8984	26.0107	0.715581
C9	28.1315	28.079	22.5645	26.1847	25.073	26.0065	2.32172
CDH1	28.1296	25.052	25.5865	26.4154	24.8012	25.9969	1.34301
CALM;CALM1;CALM2	25.1141	25.008	25.2115	26.8209	27.5454	25.94	1.16565
VCP;TERAL2	25.6264	27.1042	25.6318	22.7844	28.0675	25.8429	1.9991
HSPA70	23.6032	25.5075	26.2332	25.5403	28.2063	25.8181	1.65493
BST1	26.3875	25.2792	25.7196	25.6694	26.0319	25.8175	0.41598
EEF1A2	26.5158	27.6062	24.453	25.3411	24.8905	25.7613	1.28641
XPNPEP2	25.7018	25.9163	25.6804	25.4954	25.8602	25.7308	0.165815
PSMA2	25.0229	26.6818	25.4121	24.7515	26.7095	25.7156	0.925044
F9	26.9715	27.0523	24.6351	25.1156	24.5595	25.6668	1.2466
HSPA4L	24.79	26.3886	24.6618	24.9886	27.4704	25.6599	1.22602
PPP1R7	24.8289	24.6896	26.1522	26.1052	26.5153	25.6583	0.837329
PSMA6	23.094	26.6251	25.4841	26.6919	26.2604	25.6311	1.49731
GPI	23.048	28.0999	22.3953	26.7676	27.7078	25.6037	2.68507
CETP	28.1373	25.3289	23.6512	26.5207	24.3215	25.5919	1.78824
MEP1A	24.52	25.0876	27.9462	26.6321	23.5279	25.5428	1.75187
RAN	26.2641	24.5459	24.7584	25.5354	26.2564	25.4721	0.808333
TGFBI	27.5578	25.4925	24.1108	25.4921	24.5121	25.4331	1.33399
PPP2R4	22.8195	24.5864	26.6053	25.2533	27.8179	25.4165	1.91312
ALB	25.5773	24.4873	25.8779	25.9209	24.9543	25.3635	0.623756
PIGR	27.5625	25.9712	26.4367	22.9432	23.7574	25.3342	1.92285
HAGH	23.9721	25.7088	25.6076	25.5979	25.6715	25.3116	0.750195
CKB	22.1943	27.6163	21.6484	27.6044	27.1696	25.2466	3.04697
IDH1	24.3362	28.2358	22.0308	25.1004	25.8595	25.1125	2.25901
CFI	26.5818	26.048	24.5523	24.0317	24.1704	25.0768	1.16158
EML1	28.2776	22.4865	24.5955	25.12	24.2799	24.9519	2.10627
YWHAG	24.8919	24.9651	25.0164	24.581	25.2667	24.9442	0.247169
CTSD	26.79	26.5846	22.7498	24.5459	24.0307	24.9402	1.7253
CLIC2	24.1341	24.6755	24.7044	24.5383	26.6382	24.9381	0.977288
NID1	25.3746	24.1454	26.1171	24.2302	24.7317	24.9198	0.82934
CDH17	27.9671	23.5311	24.5241	24.9207	23.4183	24.8723	1.84489
HNRNPA2B1	25.4623	25.1593	24.7959	24.1632	24.2742	24.771	0.557992
UBA7	25.689	25.352	23.4004	24.1553	25.2559	24.7705	0.958268
YWHAB	22.9018	26.4178	24.6161	24.5797	25.2455	24.7522	1.27375
ARHGDIA	22.7789	26.2106	23.856	24.5749	26.0785	24.6998	1.46636
PTGDS	24.4956	25.9583	24.8165	23.6849	24.5171	24.6945	0.821977
SPTBN1	24.2879	25.1443	25.3244	23.8904	24.599	24.6492	0.593679
GSTA1;GSTA2;GSTA3;GSTA4;GSTA5	22.0418	26.963	24.1391	23.3038	26.7847	24.6465	2.16696
HMBS	25.2979	22.7495	25.0162	24.5107	25.5674	24.6283	1.12078
CFL2	23.6741	26.1748	24.0922	24.5133	24.669	24.6247	0.949259
A2ML1	25.7116	25.1199	24.1655	24.2944	23.572	24.5727	0.842802
HSPA4	22.6491	25.8788	24.4032	23.913	25.9045	24.5497	1.38213
PVALB	23.9953	25.5757	20.0105	27.6846	25.4119	24.5356	2.85196
NUTF2	24.5209	24.7262	23.5006	24.2794	25.5363	24.5127	0.736928
TKT	21.1912	28.3119	21.0678	25.6823	25.9238	24.4354	3.18836
HNRNPA3	24.5533	24.6569	24.054	23.975	24.8285	24.4135	0.378325
KPNB1	25.204	24.3941	23.4574	24.0293	24.9278	24.4025	0.698399
ANK1	25.7473	22.5918	25.4654	23.2915	24.6484	24.3489	1.36907
NACA	24.0274	25.1347	23.6966	23.6313	24.9621	24.2904	0.710656
PSMB3	22.9798	24.8217	24.4741	23.2497	25.4091	24.1869	1.0386
EEF1B2;EEF1B	22.104	26.164	24.2755	23.8948	24.4003	24.1677	1.44777
UCHL3	21.9563	24.3099	23.8108	25.658	24.9514	24.1373	1.40251
UBE2L3	23.6838	26.1951	23.5284	23.6511	23.3701	24.0857	1.18562
GATD3A	21.2872	25.761	23.9447	23.8781	25.5332	24.0808	1.78859
RAP1B;RAP1A	25.3314	25.404	23.752	24.0332	21.8	24.0641	1.46851
YWHAQ	24.7614	25.8571	22.8543	23.2643	23.5792	24.0633	1.22878
F13A1	24.2905	25.1338	24.5811	23.5507	22.6339	24.038	0.970627
F10	26.7688	22.6585	22.7901	24.4809	23.4701	24.0337	1.69085
FGA	25.2815	26.8261	22.5942	23.1785	21.9729	23.9706	2.02394
WBP4	23.7644	24.2123	23.897	22.5963	25.3017	23.9543	0.970258
ATP5H	22.8113	24.6551	24.9969	24.2245	22.9602	23.9296	0.992808
PSMA3	23.8074	25.3165	23.9313	21.7869	24.7838	23.9252	1.34715
USP5	21.0244	24.3631	24.4356	24.3142	25.4837	23.9242	1.69169
GSTA1;GSTA2;GSTA3;GSTA4;GSTA5	19.3044	28.0153	23.4261	22.8996	25.8336	23.8958	3.27946
ACLY	23.5559	30.6332	24.4751	18.3179	22.4965	23.8957	4.4417
CBR1	23.9435	23.4553	23.4942	23.9272	24.5582	23.8757	0.445927
SELENOP	24.0901	23.7191	24.3975	23.5484	23.4827	23.8476	0.387428
EPB41	24.3756	24.2364	24.7204	23.0057	22.863	23.8402	0.847021
APOD	22.2256	23.5122	23.0137	25.3635	24.7559	23.7742	1.27816
PSMB2	23.2207	24.2513	23.8544	22.8927	24.6389	23.7716	0.718555
NSFL1C	22.8993	24.0632	23.7362	23.3947	24.7623	23.7711	0.701929
CPB2	26.6748	26.0255	22.7719	21.4744	21.2721	23.6437	2.54712
AHCY	21.4075	30.2584	21.2677	22.44	22.8091	23.6365	3.75985
HNRNPH2	24.5823	25.0977	23.3695	21.3824	23.7296	23.6323	1.43095
GLO1	22.3114	23.5379	23.5992	23.8889	24.7254	23.6126	0.868001
CNDP2	22.5157	26.1727	23.1795	21.7643	24.34	23.5944	1.72397
DSTN	23.4043	25.9089	21.4811	24.3817	22.7745	23.5901	1.66966
ALDH9A1	26.8737	26.9842	20.242	21.0435	22.7023	23.5692	3.19308
RAP1A	23.0687	24.1345	22.4279	22.9832	25.2114	23.5651	1.10825
CPN1	24.2087	25.6565	23.6995	24.0556	19.9522	23.5145	2.12645
SET	25.4865	26.2837	23.5186	21.0182	21.1901	23.4994	2.40782
SERPINF1	25.1555	25.7245	24.6735	21.0039	20.9101	23.4935	2.3454
PKM	22.035	25.1967	22.6332	22.9401	24.4724	23.4555	1.32528
VCAM1	24.2455	23.1131	21.6666	24.9777	23.2	23.4405	1.25725
RAB7A	23.5679	23.7534	23.2459	24.0504	22.4803	23.4196	0.600813
CMBL	20.8893	26.911	20.6649	24.3469	24.118	23.386	2.62309
PGM1	19.8883	25.7692	22.6991	25.7616	22.801	23.3838	2.46836
ACO1	22.0952	27.454	21.1163	21.7621	24.4651	23.3786	2.60614
NCAM1	22.0268	24.4279	24.7867	20.7796	24.807	23.3656	1.85103
PSMB1	22.4331	24.746	21.2326	23.2041	24.9875	23.3206	1.57886
NAP1L1	23.4122	23.2018	22.9206	23.4389	23.5546	23.3056	0.250055
SPARC	22.7387	21.9911	24.9438	22.3122	24.5245	23.302	1.34218
ACTN1	22.9914	24.5323	22.9818	20.9344	24.7635	23.2407	1.53586
TCEB1	20.9182	23.8667	23.4922	22.657	25.1686	23.2205	1.57358
F10	24.6583	24.7338	22.1364	22.0106	22.0881	23.1255	1.43473
BCHE	22.9481	22.1495	24.8814	21.7091	23.6363	23.0649	1.25658
ADA	22.2632	22.6066	23.2153	23.8147	23.1155	23.0031	0.596032
QSOX1	24.6572	23.7144	20.5417	22.438	23.3083	22.9319	1.55624
TCN2	26.0861	23.9288	19.3203	24.7348	19.8024	22.7745	3.03753
ATP6V1A	21.8071	24.164	21.9433	20.8823	24.9412	22.7476	1.71966
CCT5	22.1026	24.4199	20.7013	20.7665	25.6224	22.7225	2.21279
PDIA3	21.2836	24.9604	22.7427	21.8229	22.4116	22.6442	1.41016
C1QC	24.9406	23.2823	20.3803	21.4467	22.7164	22.5533	1.74671
ACP1	21.9623	23.4169	21.765	22.8029	22.5803	22.5055	0.664831
VTN	21.7163	22.6731	22.6496	23.3115	21.9703	22.4642	0.632296
PLXDC2	23.4375	21.2954	23.7044	22.7952	20.93	22.4325	1.25596
BLMH	21.2925	23.6209	20.8899	20.8754	24.8127	22.2983	1.80909
GKN1	22.6421	22.4637	22.6758	21.9336	21.7592	22.2949	0.421804
REV3L	22.1493	21.6047	21.9245	22.4931	23.1634	22.267	0.59674
PA2G4	24.4682	21.6524	22.3898	21.5323	20.6187	22.1323	1.4495
CDH5	23.6212	20.4733	23.7835	22.8078	19.8668	22.1105	1.82221
YWHAH	21.7113	24.1735	17.8582	22.1394	24.3312	22.0427	2.61758
GCLM	21.7418	21.6652	21.5536	22.1272	23.0927	22.0361	0.628807
PAFAH1B2	20.425	22.0701	21.1805	21.5081	24.5314	21.943	1.56449
CLTC	22.765	23.4804	21.2829	20.3896	21.59	21.9016	1.22514
OGN	20.3254	24.3677	20.4454	23.7989	20.4332	21.8741	2.02722
XPO7	22.5143	20.9956	21.4051	20.9594	23.2408	21.8231	1.01157
OASL	23.3399	23.2112	19.6254	23.5835	19.2142	21.7948	2.17707
RAB11B;RAB11A	21.1552	22.2898	22.0276	20.5009	22.2225	21.6392	0.781741
AGO2	21.5503	20.9668	22.2174	20.4882	21.8419	21.4129	0.68999
HSPA4	20.3293	22.8488	18.8787	21.274	22.8683	21.2398	1.70632
TALDO1	18.4465	24.3329	19.6138	21.0828	22.4627	21.1877	2.31949
CREG1	20.4665	20.2786	19.8657	20.8533	21.2766	20.5481	0.540559
RHOA	17.5387	22.9411	19.239	20.0399	22.2534	20.4024	2.21117
CHGB	22.164	20.9642	17.8648	17.64	20.2441	19.7754	1.97157
ARPC4	17.8278	24.2674	18.1734	19.0846	18.418	19.5542	2.67453
PFKL	17.9956	21.3008	17.3693	19.0176	21.8703	19.5107	1.99354

## Sheet: PL NH x MU
Supplementary Table S2. Core proteomes of CSF and PL
Gene.names	NH6-PL	NH7-PL	NH8-PL	NH9-PL	NH10-PL	PL_NH_AVERAGE	NH_PL_STDEV
APOA1	38.6489	37.9363	37.7553	38.0266	37.7302	38.0195	0.373019
ALB	37.6455	37.4672	37.2372	37.9417	36.9526	37.4489	0.378483
HBAA	35.7769	37.1641	37.3972	36.6116	37.7366	36.9373	0.767196
HBB	35.1146	36.5027	36.7428	35.6166	36.8162	36.1586	0.754284
TF	35.4451	35.0328	33.3058	35.267	33.2289	34.4559	1.09516
HBAD	31.0826	33.5998	34.4218	31.9835	35.4777	33.3131	1.78465
A2M	34.2582	33.9316	32.0627	33.7537	31.6771	33.1367	1.17838
TTR	34.2969	32.7379	32.953	32.3073	32.7517	33.0093	0.757275
APOB	33.9335	32.0682	31.0219	33.5932	31.0807	32.3395	1.36993
HBBR;HBE	30.0158	32.6869	33.3775	30.4824	33.0246	31.9174	1.55121
VTN	32.0131	32.1774	31.3089	31.5656	30.8863	31.5903	0.524114
ITIH2	32.0694	31.4116	31.0053	32.0403	30.4244	31.3902	0.700928
FN1	32.2006	29.7888	30.1071	32.6906	30.7277	31.103	1.28303
GC	31.2637	30.9834	30.2953	31.8781	29.8685	30.8578	0.793208
A2M	31.8186	31.1228	30.2075	31.1946	29.6786	30.8044	0.852361
C3	31.3495	31.1971	29.0522	31.1664	29.5576	30.4646	1.07583
TTR	30.1635	29.5912	28.9513	31.479	31.1579	30.2686	1.05607
APOA4	31.3084	29.8497	29.099	30.0136	30.9564	30.2454	0.888823
ITIH3	30.4614	30.803	28.7651	30.7704	29.1847	29.9969	0.954045
SERPINF2	30.478	29.8605	30.0375	29.8024	29.3678	29.9092	0.402128
C5	31.2938	30.0367	28.3306	30.7679	28.9449	29.8748	1.23357
SERPINC1	29.9765	30.2684	29.8154	29.6802	28.9761	29.7433	0.48164
SERPINA4	30.3994	30.2359	30.1519	29.0038	28.82	29.7222	0.747885
SERPIND1	30.8585	29.524	29.0602	29.7662	29.1828	29.6783	0.716216
HRG	29.5716	29.6623	29.0684	29.2973	29.976	29.5151	0.347932
KNG1	30.6011	29.26	28.514	29.6094	29.2042	29.4377	0.761948
C4A	31.2357	29.7529	28.773	28.4706	28.3844	29.3233	1.19931
GSN	31.4057	28.8223	27.6426	29.8646	28.5746	29.262	1.43586
PRDX1	26.8597	30.1014	29.8952	28.2612	31.1805	29.2596	1.69991
AP2A2	29.7043	29.7118	28.9289	30.1605	26.6752	29.0362	1.39219
PLG	30.3585	28.6576	28.5413	29.9781	27.449	28.9969	1.17637
MINPP1	29.7615	28.9138	28.6959	29.0127	28.3473	28.9462	0.522394
RBP4	29.7793	29.0626	28.0496	29.5671	28.1583	28.9234	0.792994
A2ML1	30.2426	28.6876	29.0524	28.8852	27.4417	28.8619	0.998843
PSME4	31.1195	30.0721	21.7366	29.9958	30.5984	28.7045	3.92138
F2	30.39	28.4054	27.2983	29.5809	27.4484	28.6246	1.34365
ITIH4;ITIH3	30.1623	28.566	26.8762	28.6079	28.2149	28.4854	1.1722
GAPDH	29.6042	29.641	29.7635	25.6297	27.4109	28.4098	1.83721
PKM	28.1848	28.148	29.4571	29.0247	27.1818	28.3993	0.880555
ENO1	28.8654	29.1826	29.0424	26.7175	27.304	28.2224	1.13092
HSPA8	25.8875	28.0002	29.9552	26.7058	29.6884	28.0474	1.78884
GPX3	29.7795	26.1935	24.5842	29.4531	29.0183	27.8057	2.29441
VNN1	30.3736	29.2117	28.9936	25.0611	24.965	27.721	2.52727
CP	29.586	27.8341	25.5138	28.3585	27.0743	27.6733	1.51462
PGAM1	28.0332	28.181	27.5792	27.7055	26.644	27.6286	0.601367
TPI1	28.0761	28.6899	29.0399	25.9297	26.296	27.6063	1.4123
LUM	28.5988	27.4151	26.869	27.5854	26.3564	27.3649	0.84211
LCAT	26.6987	27.1298	26.9639	28.9525	26.049	27.1588	1.08393
CLU	28.5749	27.2249	26.0503	27.1464	26.6209	27.1235	0.938319
AGT	28.9746	26.2268	26.3493	27.353	26.2198	27.0247	1.18855
MDH1	26.9873	27.1994	27.9234	26.5948	26.1559	26.9721	0.664343
HSP90AA1	23.5411	27.1561	29.2142	25.71	28.4764	26.8196	2.26783
CA2	24.6884	27.0255	27.6379	25.7199	28.6924	26.7528	1.57705
ALB	27.259	26.5539	25.9935	27.5791	25.7418	26.6255	0.78994
MCFD2	27.1507	27.5967	25.2175	26.2733	26.7955	26.6067	0.915547
BST1	27.5158	25.9162	25.9762	27.4616	25.4585	26.4657	0.955309
AHSG	25.0972	26.5783	27.9761	27.6711	24.9799	26.4605	1.39885
GOT1	27.0486	26.3022	27.2787	27.0838	24.5361	26.4499	1.13267
LDHA	27.1537	26.8918	26.7653	27.2032	23.8855	26.3799	1.40618
AFABP	27.4802	26.8202	27.8463	26.2909	23.2433	26.3362	1.82971
TUBB4B	25.386	25.9409	27.8975	23.9579	27.7401	26.1845	1.65898
SERPINF1	28.6478	23.0124	24.6494	27.9714	25.6858	25.9934	2.3316
TUBA1A;TUBA4B;TUBA3E;TUBA1C	23.4953	25.9463	27.6595	23.6052	29.0915	25.9596	2.46548
PROS1	27.5091	25.8315	24.2288	27.8044	23.8228	25.8393	1.82414
PTGDS	25.0169	26.3963	25.8882	25.964	25.6343	25.7799	0.507186
TUBB1	25.5423	25.6264	25.8597	23.3131	28.2059	25.7095	1.73435
SOD3	25.7223	25.315	24.5331	26.2356	26.5184	25.6649	0.784372
GPLD1	28.2757	24.3955	25.8595	24.8639	24.6241	25.6037	1.59466
LCN10;LCN8;AL355987.1;LCN6	26.6253	27.1208	22.9043	26.8974	24.4403	25.5976	1.8479
FETUB	23.579	25.8305	25.9756	27.2177	25.1439	25.5493	1.33143
PGK	26.2912	26.212	27.6884	25.2133	22.1013	25.5012	2.09494
TFRC	27.8843	25.1308	24.2812	25.2044	24.9428	25.4887	1.3878
YWHAZ	24.6495	25.4491	27.5684	23.8439	25.8727	25.4767	1.40383
GPI	23.4584	25.3952	27.9264	25.942	24.0493	25.3542	1.75073
UBB	23.9437	25.6403	25.7327	23.9155	27.4537	25.3372	1.47403
CALM2	22.9225	25.1402	26.7604	24.4827	27.3538	25.3319	1.78128
YWHAE	24.2172	24.9232	26.975	23.764	26.363	25.2485	1.37806
LDHB	23.8143	24.51	26.9513	25.9748	24.9805	25.2462	1.23502
MB	26.8931	28.9855	26.8046	21.6329	21.6112	25.1855	3.36803
GDI2	23.0886	25.3543	27.1865	24.6724	25.6009	25.1806	1.48872
A2ML1	26.9212	25.6028	25.2445	25.9373	22.1134	25.1638	1.81597
SOD1	22.9088	25.7712	25.8593	23.5821	27.4547	25.1152	1.84904
TGFBI	26.0279	23.7418	22.588	27.2494	25.9488	25.1112	1.89443
NME2	21.9098	25.2051	26.35	26.0352	25.7105	25.0421	1.80148
ADIPOQ	25.2575	23.9718	23.8976	27.8854	23.4022	24.8829	1.81306
CDH1	24.7371	23.7786	22.8776	27.3145	25.4461	24.8307	1.69399
APOH	22.6394	25.8903	23.6674	26.721	24.9016	24.7639	1.64576
HSP70	21.869	25.175	26.8086	22.8217	27.0614	24.7471	2.3334
EEF1A1	25.1475	24.1798	25.6222	22.2064	26.1274	24.6566	1.54654
F9	25.9531	24.9951	22.8768	25.4776	23.8957	24.6396	1.24649
LRRC15	26.8435	23.3539	21.6273	26.8509	23.9168	24.5185	2.28709
PSMA7	26.0755	21.5148	25.4768	24.7362	24.6689	24.4944	1.76297
PEBP1	24.1164	24.288	26.3216	22.4505	25.2549	24.4863	1.43872
IDH1	25.5508	23.5083	23.6252	25.4813	23.5626	24.3456	1.06952
BTD	26.7548	23.0455	24.2575	24.025	23.5636	24.3293	1.43312
CETP	27.124	22.2544	20.0662	27.2825	24.6406	24.2735	3.12618
APOD	27.1522	20.6203	23.8241	24.3155	25.4396	24.2703	2.40811
PROC	25.4193	21.4946	26.4654	25.1873	22.5381	24.2209	2.10195
COMP	24.2482	23.4293	23.7906	24.6406	24.8622	24.1942	0.59083
C9	23.1191	26.3095	20.9704	25.8871	24.4296	24.1432	2.1755
F10	25.9588	23.8259	22.2195	25.8324	22.2156	24.0105	1.84246
SELENOP	25.8411	23.8697	22.9972	25.3641	21.9589	24.0062	1.61546
ANPEP;APDE	24.8158	24.0405	23.2693	25.6584	21.6924	23.8953	1.51836
CLEC3B	26.5142	23.2243	21.4857	24.0931	23.454	23.7543	1.81998
SOD2	24.6163	22.9144	22.7892	26.154	22.2338	23.7416	1.61629
LOC776594	24.4801	21.513	23.986	24.7421	23.8674	23.7177	1.28316
YWHAG	23.0067	23.4747	25.8256	21.8893	23.875	23.6143	1.44239
CPN1	26.3831	21.1212	21.1349	25.9121	22.1864	23.3475	2.5977
ALAD	21.7601	22.3605	24.3673	21.3429	26.7445	23.3151	2.24089
DSTN	21.6957	23.0978	25.034	21.4676	25.2688	23.3128	1.79266
TMSB4X	21.0119	23.5485	24.695	20.5997	25.4095	23.0529	2.16102
YWHAQ	21.1378	21.914	25.5627	21.7402	24.5339	22.9777	1.94631
PSMB2	23.8038	21.7907	22.8576	23.3911	22.8722	22.9431	0.755283
RAB1A	22.3227	22.4484	24.1945	21.2455	24.0799	22.8582	1.25835
CBB2	23.9548	22.0725	21.418	24.0127	22.6041	22.8124	1.14902
CACNA2D1	24.195	23.4107	23.1429	22.4004	20.7402	22.7778	1.30735
GSTA1;GSTA2;GSTA3;GSTA4;GSTA5	20.776	22.4947	25.45	21.4294	23.6315	22.7563	1.85558
PSMB1	21.7909	22.2793	23.2616	22.6135	23.6657	22.7222	0.751062
ENPP2	25.3981	23.6279	21.9847	20.1416	22.4232	22.7151	1.95406
PLXDC2	23.5739	22.2371	22.253	23.1774	21.7786	22.604	0.743076
AMBP	22.7356	21.8999	20.6339	22.619	21.7457	21.9268	0.842397
C1QC	22.8746	19.8661	20.6718	22.5898	21.4404	21.4885	1.26847
NCAM1	23.1667	19.1648	20.8747	19.9812	22.9963	21.2367	1.79035
CPSMB7	21.3752	20.2894	20.71	21.0134	20.2765	20.7329	0.473488
